# Supplementary material
Source: ML conference proceedings conference paper supplement (https://openreview.net/forum?id=05rBhFU3mLX)
Supplement: supplementary_material [file attachment]

# ACCELERATED RIEMANNIAN OPTIMIZATION: HANDLING CONSTRAINTS TO BOUND GEOMETRIC PENALTIES

**Anonymous authors**

Paper under double-blind review

## ABSTRACT

We propose a globally-accelerated, first-order method for the optimization of smooth and (strongly or not) geodesically-convex functions in Hadamard manifolds. Our algorithm enjoys the same convergence rates as Nesterov’s accelerated gradient descent, up to a multiplicative geometric penalty and log factors. Crucially, we can enforce our method to stay within a compact set we define. Prior fully accelerated works *resort to assuming* that the iterates of their algorithms stay in some pre-specified compact set, except for two previous methods, whose applicability is limited to local optimization and to spaces of constant curvature, respectively. Achieving global and general Riemannian acceleration without iterates assumptively staying in the feasible set was asked as an open question in (Kim & Yang, 2022), which we solve for Hadamard manifolds. In our solution, we show that we can use a linearly convergent algorithm for constrained strongly g-convex smooth problems to implement a Riemannian inexact proximal point operator that we use as a subroutine, which is of independent interest.

## 1 INTRODUCTION

Riemannian optimization concerns the optimization of a function defined over a Riemannian manifold. It is motivated by constrained problems that can be naturally expressed on Riemannian manifolds allowing to exploit the geometric structure of the problem and effectively transforming it into an unconstrained one. Moreover, there are problems that are not convex in the Euclidean setting, but that when posed as problems over a manifold with the right metric, are convex when restricted to every geodesic, and this allows for fast optimization (Cruz Neto et al., 2006; Carvalho Bento & Melo, 2012; Bento et al., 2015; Allen-Zhu et al., 2018). That is, they are geodesically convex (g-convex) problems, cf. Definition 1.1. Some applications of Riemannian optimization in machine learning include dictionary learning (Cherian & Sra, 2017; Sun et al., 2017), robust covariance estimation in Gaussian distributions (Wiesel, 2012), Gaussian mixture models (Hosseini & Sra, 2015), operator scaling (Allen-Zhu et al., 2018), computation of Brascamp-Lieb constants (Bennett et al., 2008), Karcher mean (Zhang et al., 2016), Wasserstein Barycenters (Weber & Sra, 2017), low-rank matrix completion (Cambier & Absil, 2016; Heidel & Schulz, 2018; Mishra & Sepulchre, 2014; Tan et al., 2014; Vandereycken, 2013), optimization under orthogonality constraints (Edelman et al., 1998; Lezcano-Casado & Martínez-Rubio, 2019), and sparse principal component analysis (Genicot et al., 2015; Huang & Wei, 2019b; Jolliffe et al., 2003). The first seven problems are defined over Hadamard manifolds, which we consider in this work. In fact, the optimization in these cases is over symmetric spaces, which satisfy a property that one instance of our algorithm requires, cf. Theorem 2.4.

Riemannian optimization, whether under g-convexity or not, is an extensive and active area of research, for which one aspires to develop Riemannian optimization algorithms that share analogous properties to the more broadly studied Euclidean methods, such as the following kinds of Riemannian first-order methods: deterministic (Bento et al., 2017; Wei et al., 2016; Zhang & Sra, 2016), adaptive

---

Most of the notations in this work have a link to their definitions. For example, if you click or tap on any instance of  $L$ , you will jump to the place where it is defined as the smoothness constant of the function we consider in this work.

(Kasai et al., 2019), projection-free (Weber & Sra, 2017; 2019), saddle-point-escaping (Criscitiello & Boumal, 2019; Sun et al., 2019; Zhou et al., 2019; Criscitiello & Boumal, 2020), stochastic (Hosseini & Sra, 2017; Khuzani & Li, 2017; Tripuraneni et al., 2018), variance-reduced (Sato et al., 2017; 2019; Zhang et al., 2016), and min-max methods (Zhang et al., 2022), among others.

Riemannian generalizations to accelerated convex optimization are appealing due to their better convergence rates with respect to unaccelerated methods, specially in ill-conditioned problems. Acceleration in Euclidean convex optimization is a concept that has been broadly explored and has provided many different fast algorithms. A paradigmatic example is Nesterov’s Accelerated Gradient Descent (AGD), cf. (Nesterov, 1983), which is considered the first general accelerated method, where the conjugate gradients method can be seen as an accelerated predecessor in a more limited scope (Martínez-Rubio, 2021). There have been recent efforts to better understand this phenomenon in the Euclidean case (Allen Zhu & Orecchia, 2017; Su et al., 2016; Drori & Teboulle, 2014; Wibisono et al., 2016; Diakonikolas & Orecchia, 2019; Joulani et al., 2020), which have yielded some fruitful techniques for the general development of methods and analyses. These techniques have allowed for a considerable number of new results going beyond the standard oracle model, convexity, or beyond first-order, in a wide variety of settings (Tseng, 2008; Beck & Teboulle, 2009; Wang et al., 2016a; Allen Zhu & Orecchia, 2015; Allen-Zhu, 2017; 2018; Carmon et al., 2017; Diakonikolas & Orecchia, 2018; Hinder et al., 2019; Gasnikov et al., 2019; Ivanova et al., 2021; Kamzolov & Gasnikov, 2020; Criado et al., 2021), among many others. There have been some efforts to achieve acceleration for Riemannian algorithms as generalizations of AGD, cf. Section 1.3. These works try to answer the following fundamental question:

*Can a Riemannian first-order method enjoy the same rates of convergence as Euclidean AGD?*

The question is posed under (possibly strongly) geodesic convexity and smoothness of the function to be optimized. And due to the lower bound in (Criscitiello & Boumal, 2021), we know the optimization must be under bounded geodesic curvature of the Riemannian manifold, and we might have to optimize over a bounded domain.

**Main result** In this work, we study the question above in the case of Hadamard manifolds  $\mathcal{M}$  of bounded sectional curvature and provide an instance of our framework for a wide class of Hadamard manifolds. For a differentiable  $f : \mathcal{M} \rightarrow \mathbb{R}$  with a global minimizer at  $x^*$ , let  $x_0 \in \mathcal{M}$  be an initial point and  $R$  be an upper bound on the distance  $d(x_0, x^*)$ . If  $f$  is  $L$ -smooth and (possibly  $\mu$ -strongly)  $g$ -convex in a closed ball of center  $x^*$  and radius  $O(R)$ , our algorithms obtain the same rates of convergence as AGD, up to logarithmic factors and up to a geometric penalty factor, cf. Theorem 2.4. See Table 1 for a succinct comparison among accelerated algorithm and their rates. This algorithm is a consequence of the general framework we design:

*General accelerated scheme* Riemacon. Given a not necessarily accelerated, linearly-convergent subroutine for strongly  $g$ -convex smooth problems, constrained to a geodesically convex set  $\mathcal{X}$ , we design first-order algorithms that enjoy the same rates as AGD when approximating  $\min_{x \in \mathcal{X}} f(x)$ , up to logarithmic factors and up to a geometric penalty factor, where  $f : \mathcal{N} \subset \mathcal{M} \rightarrow \mathbb{R}$  is a differentiable function that is smooth and  $g$ -convex (or strongly  $g$ -convex) in  $\mathcal{X} \subset \mathcal{N}$ , cf. Theorem 2.2.

Importantly, our algorithms obtain acceleration without an undesirable assumption that most previous works had to make: that the iterates of the algorithm stay inside of a pre-specified compact set without any mechanism for enforcing or guaranteeing this condition. To the best of our knowledge only two previous methods are able to deal with some form of constraints, and they apply to the limited settings of local optimization (Criscitiello & Boumal, 2021) and constant sectional curvature manifolds (Martínez-Rubio, 2021), respectively. Techniques in the rest of papers resort to assuming that the iterates of their algorithms are always feasible. Removing this condition in general, global, and fully accelerated methods was posed as an open question in (Kim & Yang, 2022), that we solve for the case of Hadamard manifolds. The difficulty of constraining problems in order to bound geometric penalties as well as the necessity of achieving this goal in order to provide full optimization guarantees with bounded geometric penalties is something that has also been noted in other kinds of Riemannian algorithms, cf. (Hosseini & Sra, 2020).

We develop new techniques on inexact proximal methods in Riemannian manifolds and show that with access to a (not necessarily accelerated) constrained linear subroutine for strongly  $g$ -convex and smooth problems, we can inexactly solve a proximal subproblem to enough accuracy so it can be used in our accelerated outer loop, in the spirit of other Euclidean algorithms like Catalyst (Lin

et al., 2017). After building this machinery, we show that we are able to implement an inexact ball optimization oracle, cf. (Carmon et al., 2020), as an instance of our solution. Crucially, the diameter  $D$  of this ball depends on  $R$  and the geometry only, so in particular it is independent on the condition number of  $f$ . We can use the linearly convergent algorithm in (Criscitiello & Boumal, 2021) for the implementation of the prox subroutine and we show that iterating the application of the ball optimization oracle leads to global accelerated convergence.

The question concerning whether there are Riemannian analogs to Nesterov’s algorithm that enjoy similar rates is a question that, to the best of our knowledge, was first formulated in (Zhang & Sra, 2016). In particular, since Nesterov’s AGD uses a proximal operator of a function’s linearization, they ask whether there is a Riemannian analog to this operation that could be used to obtain accelerated rates in the Riemannian case. We show that, instead, a proximal step with respect to the *whole* function can be approximated efficiently in Hadamard manifolds and it can be used along with an accelerated outer loop. To the best of our knowledge, previously known Riemannian proximal methods either obtain asymptotic analyses, assume exact proximal computation, or work with approximate proximal operators by using different inexactness conditions as ours, and none of them show how to implement the proximal operators or obtain accelerated proximal point methods, cf. Section 1.3.

### 1.1 PRELIMINARIES

We provide definitions of Riemannian geometry concepts that we use in this work. The interested reader can refer to (Petersen, 2006; Bacák, 2014) for an in-depth review of this topic, but for this work the following notions will be enough. A Riemannian manifold  $(\mathcal{M}, \mathbf{g})$  is a real  $C^\infty$  manifold  $\mathcal{M}$  equipped with a metric  $\mathbf{g}$ , which is a smoothly varying, i.e.,  $C^\infty$ , inner product. For  $x \in \mathcal{M}$ , denote by  $T_x\mathcal{M}$  the tangent space of  $\mathcal{M}$  at  $x$ . For vectors  $v, w \in T_x\mathcal{M}$ , we denote the inner product of the metric by  $\langle v, w \rangle_x$  and the norm it induces by  $\|v\|_x \stackrel{\text{def}}{=} \sqrt{\langle v, v \rangle_x}$ . Most of the time, the point  $x$  is known from context, in which case we write  $\langle v, w \rangle$  or  $\|v\|$ .

A geodesic of length  $\ell$  is a curve  $\gamma : [0, \ell] \rightarrow \mathcal{M}$  of unit speed that is locally distance minimizing. A uniquely geodesic space is a space such that for every two points there is one and only one geodesic that joins them. In such a case the exponential map  $\text{Exp}_x : T_x\mathcal{M} \rightarrow \mathcal{M}$  and the inverse exponential map  $\text{Log}_x : \mathcal{M} \rightarrow T_x\mathcal{M}$  are well defined for every pair of points, and are as follows. Given  $x, y \in \mathcal{M}$ ,  $v \in T_x\mathcal{M}$ , and a geodesic  $\gamma$  of length  $\|v\|$  such that  $\gamma(0) = x$ ,  $\gamma(\|v\|) = y$ ,  $\gamma'(0) = v/\|v\|$ , we have that  $\text{Exp}_x(v) = y$  and  $\text{Log}_x(y) = v$ . We denote by  $d(x, y)$  the distance between  $x$  and  $y$ , and note that it takes the same value as  $\|\text{Log}_x(y)\|$ . The manifold  $\mathcal{M}$  comes with a natural parallel transport between vectors in different tangent spaces, that formally is defined from a way of identifying nearby tangent spaces, known as the Levi-Civita connection  $\nabla$  (Levi-Civita, 1977). We use this parallel transport throughout this work.

Given a 2-dimensional subspace  $V \subseteq T_x\mathcal{M}$  of the tangent space of a point  $x$ , the sectional curvature at  $x$  with respect to  $V$  is defined as the Gauss curvature, for the surface  $\text{Exp}_x(V)$  at  $x$ . The Gauss curvature at a point  $x$  can be defined as the product of the maximum and minimum curvatures of the curves resulting from intersecting the surface with planes that are normal to the surface at  $x$ . A Hadamard manifold is a complete simply connected Riemannian manifold whose sectional curvature is non-positive, like the hyperbolic space or the space of  $n \times n$  symmetric positive definite matrices with the metric  $\langle X, Y \rangle_A \stackrel{\text{def}}{=} \text{Tr}(A^{-1}XA^{-1}Y)$  where  $X, Y$  are in the tangent space of  $A$ . Hadamard manifolds are uniquely geodesic. Note that in a general manifold  $\text{Exp}_x(\cdot)$  might not be defined for each  $v \in T_x\mathcal{M}$ , but in a Hadamard manifold of dimension  $n$ , the exponential map at any point is a global diffeomorphism between  $T_x\mathcal{M} \cong \mathbb{R}^n$  and the manifold, and so the exponential map is defined everywhere. We now proceed to define the main properties that will be assumed on our model for the function to be minimized and on the feasible set  $\mathcal{X}$ .

**Definition 1.1 (Geodesic Convexity and Smoothness).** Let  $f : \mathcal{N} \subset \mathcal{M} \rightarrow \mathbb{R}$  be a differentiable function defined on an open set  $\mathcal{N}$  contained in a Riemannian manifold  $\mathcal{M}$ . Given  $L \geq \mu > 0$ , we say that  $f$  is  $L$ -smooth in a set  $\mathcal{X} \subseteq \mathcal{N}$  if for any two points  $x, y \in \mathcal{X}$ ,  $f$  satisfies

$$f(y) \leq f(x) + \langle \nabla f(x), \text{Log}_x(y) \rangle + \frac{L}{2}d(x, y)^2.$$

Analogously, we say that  $f$  is  $\mu$ -strongly  $g$ -convex in  $\mathcal{X}$ , if for any two points  $x, y \in \mathcal{X}$ , we have

$$f(y) \geq f(x) + \langle \nabla f(x), \text{Log}_x(y) \rangle + \frac{\mu}{2}d(x, y)^2.$$

If the previous inequality is satisfied with  $\mu = 0$ , we say the function is  $g$ -convex in  $\mathcal{X}$ .

We present the following fact about the squared-distance function, when one of the arguments is fixed. The constants  $\zeta_D, \delta_D$  below appear everywhere in Riemannian optimization because, among other things, [Fact 1.2](#) yields Riemannian inequalities that are analogous to the equality in the Euclidean cosine law of a triangle, cf. [Corollary C.3](#), and these inequalities have wide applicability in the analyses of Riemannian methods.

**Fact 1.2 (Local information of the squared-distance).** *Let  $\mathcal{M}$  be a Riemannian manifold of sectional curvature bounded by  $[\kappa_{\min}, \kappa_{\max}]$  that contains a uniquely  $g$ -convex set  $\mathcal{X} \subset \mathcal{M}$  of diameter  $D < \infty$ . Then, given  $x, y \in \mathcal{X}$  we have the following for the function  $\Phi_x : \mathcal{M} \rightarrow \mathbb{R}, y \mapsto \frac{1}{2}d(x, y)^2$ :*

$$\nabla \Phi_x(y) = -\text{Log}_y(x) \quad \text{and} \quad \delta_D \|v\|^2 \leq \text{Hess } \Phi_x(y)[v, v] \leq \zeta_D \|v\|^2,$$

where

$$\zeta_D \stackrel{\text{def}}{=} \begin{cases} D\sqrt{|\kappa_{\min}|} \coth(D\sqrt{|\kappa_{\min}|}) & \text{if } \kappa_{\min} \leq 0 \\ 1 & \text{if } \kappa_{\min} > 0 \end{cases},$$

and

$$\delta_D \stackrel{\text{def}}{=} \begin{cases} 1 & \text{if } \kappa_{\max} \leq 0 \\ D\sqrt{\kappa_{\max}} \cot(D\sqrt{\kappa_{\max}}) & \text{if } \kappa_{\max} > 0 \end{cases},$$

In particular,  $\Phi_x$  is  $\delta_D$ -strongly  $g$ -convex and  $\zeta_D$ -smooth in  $\mathcal{X}$ . See ([Lezcano-Casado, 2020](#)) for a proof.

## 1.2 NOTATION.

Let  $\mathcal{M}$  be a uniquely geodesic  $n$ -dimensional Riemannian manifold. Given points  $x, y, z \in \mathcal{M}$ , we abuse the notation and write  $y$  in non-ambiguous and well-defined contexts in which we should write  $\text{Log}_x(y)$ . For example, for  $v \in T_x\mathcal{M}$  we have  $\langle v, y - x \rangle = -\langle v, x - y \rangle = \langle v, \text{Log}_x(y) - \text{Log}_x(x) \rangle = \langle v, \text{Log}_x(y) \rangle$ ;  $\|v - y\| = \|v - \text{Log}_x(y)\|$ ;  $\|z - y\|_x = \|\text{Log}_x(z) - \text{Log}_x(y)\|$ ; and  $\|y - x\|_x = \|\text{Log}_x(y)\| = d(y, x)$ . We denote by  $\mathcal{X}$  a compact, uniquely geodesic  $g$ -convex set of diameter  $D$  contained in an open set  $\mathcal{N} \subset \mathcal{M}$  and we use  $I_{\mathcal{X}}$  for the indicator function of  $\mathcal{X}$ , which is 0 at points in  $\mathcal{X}$  and  $+\infty$  otherwise. For a vector  $v \in T_y\mathcal{M}$ , we use  $\Gamma_y^x(v) \in T_x\mathcal{M}$  to denote the parallel transport of  $v$  from  $T_y\mathcal{M}$  to  $T_x\mathcal{M}$  along the unique geodesic that connects  $y$  to  $x$ . We call  $f : \mathcal{N} \subset \mathcal{M} \rightarrow \mathbb{R}$  a differentiable  $L$ -smooth  $g$ -convex function we want to optimize. We use  $\varepsilon$  to denote the approximation accuracy parameter,  $x_0 \in \mathcal{X}$  for the initial point of our algorithms, and  $\bar{R} \stackrel{\text{def}}{=} d(x_0, \bar{x}^*)$  for the initial distance to an arbitrary constrained minimizer  $\bar{x}^* \in \arg \min_{x \in \mathcal{X}} f(x)$ . We use  $R$  for an upper bound on the initial distance  $d(x_0, x^*)$  to an unconstrained minimizer  $x^*$ , if it exists. The big- $O$  notation  $\tilde{O}(\cdot)$  omits log factors. Note that in the setting of Hadamard manifolds, the bounds on the sectional curvature are  $\kappa_{\min} \leq \kappa_{\max} \leq 0$ . Hence for notational convenience, we define  $\bar{\zeta} \stackrel{\text{def}}{=} \zeta_D = D\sqrt{|\kappa_{\min}|} \coth(D\sqrt{|\kappa_{\min}|}) \geq 1$ ,  $\bar{\delta} \stackrel{\text{def}}{=} 1$ , and similarly  $\zeta \stackrel{\text{def}}{=} \zeta_R$  and  $\delta \stackrel{\text{def}}{=} \delta_R = 1$ . If  $v \in T_x\mathcal{M}$ , we use  $\Pi_{\bar{B}(0, r)}(v) \in T_x\mathcal{M}$  for the projection of  $v$  onto the closed ball with center at 0 and radius  $r$ .

## 1.3 OUR RESULTS AND COMPARISONS WITH RELATED WORK

In this work, we optimize functions defined over Hadamard manifolds  $\mathcal{M}$  of finite dimension  $n$  and of sectional curvature bounded in  $[\kappa_{\min}, \kappa_{\max}]$ . As all previous related works discussed in the sequel, we assume that we can compute the exponential and inverse exponential maps, and parallel transport of vectors for our manifold. The differentiable function  $f$  to be optimized is defined over an open set  $\mathcal{N} \subset \mathcal{M}$  that contains a compact  $g$ -convex set  $\mathcal{X}$  of finite diameter  $D$ . Our function  $f$  is  $L$ -smooth and  $g$ -convex (or  $\mu$ -strongly  $g$ -convex) in  $\mathcal{X}$  and we have access to it via a gradient oracle that can be queried at points in  $\mathcal{X}$ . For this setting, we show in [Theorem 2.2](#) that with access to a (possibly unaccelerated) linearly convergent subroutine for  $g$ -strongly smooth problems in  $\mathcal{X}$ , the algorithms we propose find a point  $y_T \in \mathcal{X}$  such that  $f(y_T) - \min_{x \in \mathcal{X}} f(x) \leq \varepsilon$  after calling the gradient oracle and the subroutine the following number of times:  $\tilde{O}(\bar{\zeta} \sqrt{LR^2/\varepsilon})$  for the  $g$ -convex case and  $\tilde{O}(\bar{\zeta} \sqrt{L/\mu} \log(\mu \bar{R}^2/\varepsilon))$  for the  $\mu$ -strongly  $g$ -convex case, where  $\bar{R} \stackrel{\text{def}}{=} d(x_0, \bar{x}^*)$  and  $x_0 \in \mathcal{X}$  is an initial point. Then in [Theorem 2.4](#), we instantiate our algorithm with the method in ([Criscitiello & Boumal, 2021](#)) as subroutine and boost the convergence by

implementing and sequentially applying an inexact ball optimization oracle and we obtain the rates  $\tilde{O}(\zeta^2 \sqrt{\zeta} + LR^2/\varepsilon)$  and  $\tilde{O}(\zeta^2 \sqrt{L/\mu} \log(\mu R^2/\varepsilon))$  where  $R$  is a bound on the initial distance  $d(x_0, x^*)$  to an unconstrained minimizer  $x^*$ . In sum, the algorithms enjoy the same rates as AGD in the Euclidean space up to a factor of  $\zeta^2 = R^2 \kappa_{\min}^2 \coth^2(R\sqrt{|\kappa_{\min}|}) \leq (1 + R \cdot |\kappa_{\min}|)^2$  (our geometric penalty) and up to universal constants and log factors. Note that as the minimum curvature  $\kappa_{\min}$  approaches 0 we have  $\zeta \rightarrow 1$ .

We emphasize that our [Algorithm 1](#) only needs to query the gradient of  $f$  at points in  $\mathcal{X}$  and the  $L$ -smoothness and  $\mu$ -strong  $g$ -convexity of  $f$  only need to hold in  $\mathcal{X}$ . This is relevant because in Riemannian manifolds the condition number  $L/\mu$  in a set can increase with the size of the set, cf. ([Martínez-Rubio, 2020](#), Proposition 27). Intuitively, although there are twice differentiable functions defined over the Euclidean space whose Hessian is constant everywhere, in other Riemannian cases the metric may preclude having such global condition and the larger the set is the larger the minimum possible condition number becomes. Compare this, for instance, with the bounds on the Hessian’s eigenvalues of the squared-distance function in [Fact 1.2](#), which are tight for spaces of constant curvature ([Lezcano-Casado, 2020](#)).

Now we proceed to compare our results with previous works. We have summarized most of the following discussion in [Table 1](#). We include Nesterov’s AGD in the table for comparison purposes<sup>1</sup>. There are some works on Riemannian acceleration that focus on empirical evaluation or that work under strong assumptions ([Liu et al., 2017](#); [Alimisis et al., 2019](#); [Huang & Wei, 2019a](#); [Alimisis et al., 2020](#); [Lin et al., 2020](#)), see ([Martínez-Rubio, 2020](#)) for instance for a discussion on these works. We focus the discussion on the most related work with guarantees. ([Zhang & Sra, 2018](#)) obtain an algorithm that, up to constants, achieves the same rates as AGD in the Euclidean space, for  $L$ -smooth and  $\mu$ -strongly  $g$ -convex functions but only *locally*, namely when the initial point starts in a small neighborhood  $N$  of the minimizer  $x^*$ : a ball of radius  $O((\mu/L)^{3/4})$  around it. ([Ahn & Sra, 2020](#)) generalize the previous algorithm and, by using similar ideas as in ([Zhang & Sra, 2018](#)) for estimating a lower bound on  $f$ , they adapt the algorithm to work globally, proving that it eventually decreases the objective as fast as AGD. However, as ([Martínez-Rubio, 2020](#)) noted, it takes as many iterations as the ones needed by Riemannian gradient descent (RGD) to reach the neighborhood of the previous algorithm. The latter work also noted that in fact RGD and the algorithm in ([Zhang & Sra, 2018](#)) can be run in parallel and combined to obtain the same convergence rates as in ([Ahn & Sra, 2020](#)), which suggested that for this technique, full acceleration with the rates of AGD only happens over the small neighborhood  $N$  in ([Zhang & Sra, 2018](#)). Note however that ([Ahn & Sra, 2020](#)) show that their algorithm will decrease the function value faster than RGD, but this is not quantified. ([Jin & Sra, 2021](#)) developed a different framework, arising from ([Ahn & Sra, 2020](#)) but with the same guarantees for accelerated first-order methods. We do not feature it in the table. ([Criscitiello & Boumal, 2021](#)) showed, under mild assumptions, that in a ball of center  $x \in \mathcal{M}$  and radius  $O((\mu/L)^{1/2})$  containing  $x^*$ , the pullback function  $f \circ \text{Exp}_x : T_x \mathcal{M} \rightarrow \mathbb{R}$  is Euclidean, strongly convex, and smooth with condition number  $O(L/\mu)$ , so AGD yields local acceleration as well. In short, acceleration is possible in a small neighborhood because there the manifold is almost Euclidean and the geometric deformations are small in comparison to the curvature of the objective. These techniques fail for the  $g$ -convex case since the neighborhood becomes a point ( $\mu/L = 0$ ).

Finding fully accelerated algorithms that are *global* presents a harder challenge. By a fully accelerated algorithm we mean one with rates with same dependence as AGD on  $L$ ,  $\varepsilon$ , and if it applies, on  $\mu$ . ([Martínez-Rubio, 2020](#)) provided such algorithms for  $g$ -convex functions, strongly or not, defined over manifolds of constant sectional curvature and constrained to a ball of radius  $R$ . The convergence rates initially had large constants with respect to  $R$  but were later improved, cf. [Table 1](#). [Kim & Yang \(2022\)](#) designed global algorithms with the same rates as AGD up to universal constants and a factor of  $\bar{\zeta}$ , their geometric penalty. However, they need to assume that the iterates of their algorithm remain in their feasible set  $\mathcal{X}$  and they point out on the necessity of removing such an assumption, which they leave as an open question. Our work solves this question for the case of Hadamard manifolds. In their technique, they show that they can use the structure of the accelerated scheme to *move* lower bound estimations on  $f(x^*)$  from one particular tangent space to another without incurring extra errors, when the right Lyapunov function is used. By *moving* lower bounds here we mean finding

<sup>1</sup>Note that the original method in ([Nesterov, 1983](#)) needed to query the gradient of the function outside of the feasible set, and this was later improved to only require queries at feasible points ([Nesterov, 2005](#)) as in our work, hence our choice of citation in the table.



Table 1: Convergence rates of related works with provable guarantees for smooth problems over uniquely geodesic manifolds. Column **K?** refers to the supported values of the sectional curvature, **G?** to whether the algorithm is global (any initial distance to a minimizer is allowed). Here **L** and **L'** mean they are local algorithms that require initial distance  $O((L/\mu)^{-3/4})$  and  $O((L/\mu)^{-1/2})$ , respectively. Column **F?** refers to whether there is full acceleration, meaning dependence on  $L$ ,  $\mu$ , and  $\varepsilon$  like AGD up to possibly log factors. Column **C?** refers to whether the method can enforce some constraints. All methods require their iterates to be in some specified compact set, but the works with **X** just assume the iterates will remain within the constraints. We use  $\mathcal{W} \stackrel{\text{def}}{=} \sqrt{\frac{L}{\mu}} \log(\frac{LR^2}{\varepsilon})$ . \*A mild condition on the covariant derivative of the metric tensor is required.

| Method                        | g-convex                                                     | $\mu$ -st. g-cvx                         | K?              | G? | F? | C? |
|-------------------------------|--------------------------------------------------------------|------------------------------------------|-----------------|----|----|----|
| (Nesterov, 2005, AGD)         | $O(\sqrt{\frac{LR^2}{\varepsilon}})$                         | $O(\mathcal{W})$                         | 0               | ✓  | ✓  | ✓  |
| (Zhang & Sra, 2018)           | -                                                            | $O(\mathcal{W})$                         | bounded         | L  | ✓  | X  |
| (Ahn & Sra, 2020)             | -                                                            | $\tilde{O}(\frac{L}{\mu} + \mathcal{W})$ | bounded         | ✓  | X  | X  |
| (Martínez-Rubio, 2020)        | $\tilde{O}(\zeta \sqrt{\zeta + \frac{LR^2}{\varepsilon}})$   | $\tilde{O}(\zeta \cdot \mathcal{W})$     | ctant. $\neq 0$ | ✓  | ✓  | ✓  |
| (Criscitiello & Boumal, 2021) | -                                                            | $O(\mathcal{W})$                         | bounded*        | L' | ✓  | ✓  |
| (Kim & Yang, 2022)            | $O(\zeta \sqrt{\frac{LR^2}{\varepsilon}})$                   | $O(\zeta \cdot \mathcal{W})$             | bounded         | ✓  | ✓  | X  |
| <b>Theorem 2.4</b>            | $\tilde{O}(\zeta^2 \sqrt{\zeta + \frac{LR^2}{\varepsilon}})$ | $\tilde{O}(\zeta^2 \cdot \mathcal{W})$   | Hadamard*       | ✓  | ✓  | ✓  |

suitable lower bounds that are simple (a quadratic in their case), if pulled-back to one tangent space, if we start with a similar bound that is simple when pulled-back to another tangent space.

**Lower bounds.** In this paragraph, we omit constants depending on the curvature bounds in the big- $O$  notations for simplicity. (Hamilton & Moitra, 2021) proved an optimization lower bound showing that acceleration in Riemannian manifolds is harder than in the Euclidean space. (Criscitiello & Boumal, 2021) largely generalized their results. They essentially show that for a large family of Hadamard manifolds, there is a function that is smooth and strongly g-convex in a ball of radius  $R$  that contains the minimizer  $x^*$ , and for which finding a point that is  $R/5$  close to  $x^*$  requires  $\tilde{\Omega}(R)$  calls to the gradient oracle. Note that these results do not preclude the existence of a fully accelerated algorithm with rates  $\tilde{O}(R)$ +AGD rates, for instance. A similar hardness statement is provided for smooth and only g-convex functions. Also, reductions as in (Martínez-Rubio, 2020) evince this hardness is also present in this case.

**Handling constraints to bound geometric penalties.** In our algorithm and in all other known fully accelerated algorithms, learning rates depend on the diameter of the feasible set. This is natural: estimation errors due to geometric deformations depend on the diameter via the constants  $\zeta_D$ ,  $\delta_D$ , the cosine-law inequalities Corollary C.3, or other analogous inequalities, and the algorithms take these errors into account. All other previous works are not able to deal with any constraints and hence they simply assume that the iterates of their algorithms stay within one such specified set, except for (Martínez-Rubio, 2020) and (Criscitiello & Boumal, 2021) that enforce a ball constraint, as we explained above. However, these two works have their applicability limited to spaces of constant curvature and to local optimization, respectively. Note that even if one could show that given a choice of learning rate, convergence implies that the iterates will remain in some compact set, then because the learning rates depend on the diameter of the set, and the diameter of the set would depend on the learning rates, one cannot conclude from this argument that the assumption these works make is going to be satisfied. In contrast, in this work, we design a general accelerated framework and an instance of it that keep the iterates bounded, effectively bounding geometric penalties while we do not need to resort to any other extra assumptions, solving the open question in (Kim & Yang, 2022).

**Riemannian proximal methods** There have been some works that study proximal methods in Riemannian manifolds, but most of them focus on asymptotic results or assume the proximal operator can be computed exactly (Wang et al., 2015; Bento et al., 2017; 2016; Khammahawong et al., 2021; Chang et al., 2021). The rest of these works study proximal point methods under different inexact versions of the proximal operator as ours and they do not show how to implement their inexact version

in applications, like in our case of smooth and g-convex optimization. In contrast, we implement the inexact proximal operator with a first-order method (Ahmadi & Khatibzadeh, 2014) provide a convergence analysis of an inexact proximal point method but when applied to optimization they assume the computation of the proximal operator is exact. (Tang & Huang, 2014) uses a different inexact condition and proves linear convergence, under a growth condition on  $f$ . (Wang et al., 2016b) obtains linear convergence of an inexact proximal point method under a different growth assumption on  $f$  and under an absolute error condition on the proximal function.

## 2 ALGORITHMIC FRAMEWORK AND PSEUDOCODE

In this section, we present our **Riemannian accelerated** algorithm for **constrained** g-convex optimization, or Riemacon<sup>2</sup>. This is a general framework that we later instantiate to provide a full algorithm. Recall our abuse of notation for points  $p \in \mathcal{M}$  to mean  $\text{Log}_q(p)$  in contexts in which one should place a vector in  $T_q\mathcal{M}$  and note that in our algorithm  $x_k$  and  $y_k$  are points in  $\mathcal{M}$  whereas  $z_k^{x_k} \in T_{x_k}\mathcal{M}$ ,  $z_k^{y_k}$ ,  $\bar{z}_k^{y_k} \in T_{y_k}\mathcal{M}$ .

---

### Algorithm 1 Riemacon: Riemannian Acceleration - Constrained g-Convex Optimization

---

**Input:** Feasible set  $\mathcal{X}$ . Initial point  $x_0 \in \mathcal{X} \subset \mathcal{N}$ . Diff. function  $f : \mathcal{N} \subset \mathcal{M} \rightarrow \mathbb{R}$  for a Hadamard manifold  $\mathcal{M}$  that is  $L$ -smooth and g-convex in  $\mathcal{X}$ . Optionally: final iteration  $T$  or accuracy  $\varepsilon$ . If  $\varepsilon$  is provided, compute the corresponding  $T$ , cf. Theorem 2.2.

**Parameters:**

- Geometric penalty  $\xi \stackrel{\text{def}}{=} 4\zeta_{2D} - 3 \leq 8\bar{\zeta} - 3 = O(\bar{\zeta})$ .
- Implicit Gradient Descent learning rate  $\lambda \stackrel{\text{def}}{=} \zeta_{2D}/L$ .
- Mirror Descent learning rates  $\eta_k \stackrel{\text{def}}{=} a_k/\xi$ .
- Proportionality constant in the proximal subproblem accuracies:  $\Delta_k \stackrel{\text{def}}{=} \frac{1}{(k+1)^2}$ .

**Definition:** (computation of this value is not needed)

- Prox. accuracies:  $\sigma_k \stackrel{\text{def}}{=} \frac{\Delta_k d(x_k, y_k^*)^2}{78\lambda}$  where  $y_k^* \stackrel{\text{def}}{=} \arg \min_{y \in \mathcal{X}} \{f(y) + \frac{1}{2\lambda} d(x_k, y)^2\}$ .
- 

```

1:  $y_0 \leftarrow x_0$ ;  $A_0 \leftarrow 200\lambda\xi$ 
2:  $z_0^{x_0} \leftarrow 0 \in T_{x_0}\mathcal{M}$ ;  $\bar{z}_0^{y_0} \leftarrow z_0^{y_0} \leftarrow 0 \in T_{y_0}\mathcal{M}$ 
3: for  $k = 1$  to  $T$  do
4:    $a_k \leftarrow 2\lambda \frac{k+32\xi}{5}$ 
5:    $A_k \leftarrow a_k/\xi + A_{k-1} = \sum_{i=1}^k a_i/\xi + A_0 = \lambda \left( \frac{k(k+1+64\xi)}{5\xi} + 200\xi \right)$ 
6:    $x_k \leftarrow \text{Exp}_{y_{k-1}} \left( \frac{a_k}{A_{k-1}+a_k} \bar{z}_{k-1}^{y_{k-1}} + \frac{A_{k-1}}{A_{k-1}+a_k} y_{k-1} \right) = \text{Exp}_{y_{k-1}} \left( \frac{a_k}{A_{k-1}+a_k} \bar{z}_{k-1}^{y_{k-1}} \right)$   $\diamond$  Coupling
7:    $z_{k-1}^{x_k} \leftarrow \Gamma_{y_{k-1}}^{x_k}(\bar{z}_{k-1}^{y_{k-1}}) + \text{Log}_{x_k}(y_{k-1}) = \text{Log}_{x_k}(\text{Exp}_{y_k}(\bar{z}_{k-1}^{y_{k-1}}))$ 
8:    $y_k \leftarrow \sigma_k$ -minimizer of the proximal problem  $\min_{y \in \mathcal{X}} \{f(y) + \frac{1}{2\lambda} d(x_k, y)^2\}$ 
9:    $v_k^x \leftarrow -\text{Log}_{x_k}(y_k)/\lambda$   $\diamond$  Approximate subgradient
10:   $z_k^{x_k} \leftarrow z_{k-1}^{x_k} - \eta_k v_k^x$   $\diamond$  Mirror Descent step
11:   $z_k^{y_k} \leftarrow \Gamma_{x_k}^{y_k}(z_k^{x_k}) + \text{Log}_{y_k}(x_k)$   $\diamond$  Moving the dual point to  $T_{y_k}\mathcal{M}$ 
12:   $\bar{z}_k^{y_k} \leftarrow \Pi_{B(0,D)}(z_k^{y_k}) \in T_{y_k}\mathcal{M}$   $\diamond$  Easy projection done so the dual point is not very far
13: end for
14: return  $y_T$ .
```

---

We start with an interpretation of our algorithm that helps understanding its high-level ideas. The following intends to be a qualitative explanation, and we refer to the pseudocode and the supplementary material for the exact descriptions and analysis. Euclidean accelerated algorithms can be interpreted, cf. (Allen Zhu & Orecchia, 2017), as a combination of a gradient descent (GD) algorithm and an online learning algorithm with losses being the affine lower bounds  $f(x_k) + \langle \nabla f(x_k), \cdot - x_k \rangle$  we obtain on  $f(\cdot)$  by applying convexity at some points  $x_k$ . That is, the latter builds a lower bound estimation on  $f$ . By selecting the next query to the gradient oracle as a cleverly picked convex combination of the predictions given by these two algorithms, one can show that the instantaneous

<sup>2</sup>Riemacon rhymes with “rima con” in Spanish.

regret of the online learning algorithm can be compensated by the local progress GD makes, which leads to accelerated convergence. In Riemannian optimization, there are two main obstacles. Firstly, the first-order approximations of  $f$  at points  $x_k$  yield functions that are affine but only with respect to their respective  $T_{x_k}\mathcal{M}$ , and so combining these lower bounds that are only simple in their tangent spaces makes obtaining good global estimations not simple. Secondly, when one obtains such global estimations, then one naturally incurs an instantaneous regret that is worse by a factor than is usual in Euclidean acceleration. This factor is a geometric constant depending on the diameter  $D$  of a set  $\mathcal{X}$  where the iterates and a (possibly constrained) minimizer lie. As a consequence, the learning rate of GD would need to be multiplicatively increased by such a constant with respect to the one of the online learning algorithm in order for the regret to still be compensated with the local progress of GD (and the rates worsen by this constant). But if we fix some  $\mathcal{X}$  of finite diameter, because GD's learning rate is now larger, it is not clear how to keep the iterates in  $\mathcal{X}$ . And if we do not have the iterates in one such set  $\mathcal{X}$ , then our geometric penalties could grow arbitrarily.

We find the answer in implicit methods. An implicit Euclidean (sub)gradient descent step is one that computes, from a point  $x_k \in \mathcal{X}$ , another point  $y_k^* = x_k - \lambda v_k \in \mathcal{X}$ , where  $v_k \in \partial(f + I_{\mathcal{X}})(y_k^*)$ , is a subgradient of  $f + I_{\mathcal{X}}$  at  $y_k^*$ . Intuitively, if we could implement a Riemannian version of an implicit GD step then it should be possible to still compensate the regret of the other algorithm and keep all the iterates in the set  $\mathcal{X}$ . Computing such an implicit step is computationally hard in general, but we show that approximating the proximal objective  $h_k(y) \stackrel{\text{def}}{=} f(y) + \frac{1}{2\lambda}d(x_k, y)^2$  with enough accuracy yields an approximate subgradient that can be used to obtain an accelerated algorithm as well. In particular, we provide an accelerated scheme for which we show that the error incurred by the approximation of the subgradient can be bounded by some terms we can control, cf. [Lemma A.2](#), namely a small term that appears in our Lyapunov function and also a term proportional to the squared norm of the approximated subgradient, which only increases the final convergence rates by a constant. This proximal approach works by exploiting the fact that the Riemannian Moreau envelop is convex in Hadamard manifolds ([Azagra & Ferrera, 2005](#)) and that the subproblem  $h_k$ , defined with our  $\lambda = \zeta_{2D}/L$ , is strongly g-convex and smooth with a condition number that only depends on the geometry. For this reason, a local algorithm like the one in ([Criscitiello & Boumal, 2021](#)) can be implemented in balls whose radius is independent on the condition number of  $f$ . Besides these steps, we use a coupling of the approximate implicit RGD and of a mirror descent (MD) algorithm, along with a technique in ([Kim & Yang, 2022](#)) to move dual points to the right tangent spaces without incurring extra geometric penalties, that we adapt to work with dual projections, cf. [Lemma A.3](#). Importantly, the MD algorithm keeps the dual point close to the set  $\mathcal{X}$  by using the projection in [Line 12](#), which implies that the point  $x_k$  is close to  $\mathcal{X}$  as well, and this is crucial to keep low geometric penalties. This MD approach is a mix between follow-the-regularized-leader algorithms, that do not project the dual variable, and pure mirror descent algorithms that always project the dual variable. In the analysis, we note that partial projection also works, meaning that defining a new dual point that is closer to all of the points in the feasible set but without being a full projection leads to the same guarantees. Because we use the mirror descent lemma over  $T_{y_k}\mathcal{M}$ , what we described translates to: we can project the dual  $z_k^{y_k}$  onto a ball defined on  $T_{y_k}\mathcal{M}$  that contains the pulled-back set  $\text{Log}_{y_k}(\mathcal{X})$  and by means of that trick we can keep the iterates  $x_k$  close to  $\mathcal{X}$ . And at the same time, the point for which we prove guarantees, namely  $y_k$ , is always in  $\mathcal{X}$ .

Finally, we instantiate our subroutine with the algorithm in ([Criscitiello & Boumal, 2021](#)), in balls of radius independent on the condition number of  $f$  and show in [Theorem 2.4](#) that if we iterate this approximate implementation of a ball optimization oracle, we obtain convergence at a globally accelerated rate. We note ([Zhang & Sra, 2016](#)) also provided a claimed linearly convergent algorithm for constrained strongly g-convex smooth problems, and thus in principle it could be used for our subroutine. Unfortunately, we noticed that the proof is flawed when the optimization is constrained.

We leave the proofs of most of our results to the supplementary material and state our main theorems below. Using the insights explained above, we show the following inequality on  $\psi_k$ , defined below, that will be used as a Lyapunov function to prove the convergence rates of [Algorithm 1](#).

**Proposition 2.1.** ( $\Downarrow$ ) *By using the notation of [Algorithm 1](#), let*

$$\psi_k \stackrel{\text{def}}{=} A_k(f(y_k) - f(\bar{x}^*)) + \frac{1}{2}\|z_k^{y_k} - \text{Log}_{y_k}(\bar{x}^*)\|_{y_k}^2 + \frac{\xi - 1}{2}\|z_k^{y_k}\|_{y_k}^2.$$

*Then, for all  $k \geq 1$ , we have  $(1 - \Delta_k)\psi_k \leq \psi_{k-1}$ .*

Finally, we can state our theorem for the optimization of  $L$ -smooth and g-convex functions.



**Theorem 2.2.** [ $\downarrow$ ] Let  $\mathcal{M}$  be a finite-dimensional Hadamard manifold of bounded sectional curvature, and consider  $f : \mathcal{N} \subset \mathcal{M} \rightarrow \mathbb{R}$  be an  $L$ -smooth and  $g$ -convex differentiable function in a compact  $g$ -convex set  $\mathcal{X} \subset \mathcal{N}$  of diameter  $D$ ,  $\bar{x}^* \in \arg \min_{x \in \mathcal{X}} f(x)$ , and  $\bar{R} \stackrel{\text{def}}{=} d(x_0, \bar{x}^*)$ . For any  $\varepsilon > 0$ , [Algorithm 1](#) yields an  $\varepsilon$ -minimizer  $y_T \in \mathcal{X}$  after  $T = O(\bar{\zeta} \sqrt{\frac{L\bar{R}^2}{\varepsilon}})$  iterations. If the function is  $\mu$ -strongly convex then, via a sequence of restarts, we converge in  $O(\bar{\zeta} \sqrt{\frac{L}{\mu}} \log(\frac{\mu\bar{R}^2}{\varepsilon}))$  iterations.

We note that a straightforward corollary from our results is that if we can compute the exact Riemannian proximal point operator and we use it as the implicit gradient descent step in [Line 8](#) of [Algorithm 1](#), then the method is an accelerated proximal point method. One such Riemannian algorithm was previously unknown in the literature as well. Finally, we instantiate [Algorithm 1](#) to implement approximate ball optimization oracles in an accelerated way. We show that applying these oracles sequentially leads to global accelerated convergence. Moreover, we show that the iterates do not get farther than  $2R$  from  $x^*$ , which ultimately leads to the geometric penalty being a function of  $\zeta$  and not on the condition number of  $f$ . For the subroutine in [Line 8](#) of [Algorithm 1](#), we use the algorithm in ([Criscitiello & Boumal, 2021](#), Section 6), and for that we require the following.

**Assumption 2.3.** Let  $\mathfrak{R}$  be the curvature tensor of a Riemannian manifold  $\mathcal{M}$ . Its covariant derivative is  $\nabla \mathfrak{R} = 0$ .

We note that locally symmetric manifolds, like  $\text{SO}(n)$ , the SPD matrix manifold, the Grassmannian manifold, manifolds of constant sectional curvature are all manifolds such that  $\nabla \mathfrak{R} = 0$ . We argue that this assumption is mild, since in particular these manifolds cover all of the applications in [Section 1](#).

**Theorem 2.4.** [ $\downarrow$ ] Let  $\mathcal{M}$  be a finite-dimensional Hadamard manifold of bounded sectional curvature satisfying [Assumption 2.3](#). Consider  $f : \mathcal{N} \subset \mathcal{M} \rightarrow \mathbb{R}$  be an  $L$ -smooth and  $\mu$ -strongly  $g$ -convex differentiable function in  $\bar{B}(x^*, 3R)$ , where  $x^*$  is its global minimizer and where  $R \geq d(x_0, x^*)$  for an initial point  $x_0$ . For any  $\varepsilon > 0$ , [Algorithm 2](#) yields an  $\varepsilon$ -minimizer after  $\tilde{O}(\zeta^2 \sqrt{L/\mu} \log(LR^2/\varepsilon))$  calls to the gradient oracle of  $f$ . By using regularization, this algorithm  $\varepsilon$ -minimizes the  $g$ -convex case ( $\mu = 0$ ) after  $\tilde{O}(\zeta^2 \sqrt{\zeta + LR^2/\varepsilon})$  gradient oracle calls.

---

**Algorithm 2** Ball Optimization Boosting of a Riemacon instance ([Algorithm 1](#))

---

**Input:** Differentiable function  $f : \mathcal{N} \subset \mathcal{M} \rightarrow \mathbb{R}$  that is  $L$ -smooth and  $\mu$ -strongly  $g$ -convex in  $\bar{B}(x^*, 3R) \subset \mathcal{N}$ ; initial point  $x_0 \in \mathcal{N}$ ; bound  $R \geq d(x_0, x^*)$ ; constant  $F$  from [Assumption 2.3](#); accuracy  $\varepsilon$ .

---

- 1: **if**  $2R \leq (46R|\kappa_{\min}|\zeta_{2R})^{-1}$  **then return** RiemaconSC( $\bar{B}(x_0, R), x_0, f, \varepsilon$ )
  - 2: Compute  $D$  such that  $D = (46R|\kappa_{\min}|\zeta_D)^{-1}$ . Alternatively, make  $D \leftarrow (70R|\kappa_{\min}|)^{-1}$ .
  - 3:  $T \leftarrow \lceil \frac{4R}{D} \ln(\frac{LR^2}{\varepsilon}) \rceil$ ;  $\varepsilon' \leftarrow \min\{\frac{D\varepsilon}{8R}, \frac{\mu R^2}{2T^2}\}$
  - 4: **for**  $k = 1$  **to**  $T$  **do**
  - 5:    $\mathcal{X}_k \leftarrow \bar{B}(x_{k-1}, D/2)$
  - 6:    $x_k \leftarrow \text{RiemaconSC}(\mathcal{X}_k, x_{k-1}, f, \varepsilon')$     $\diamond$  ([Criscitiello & Boumal, 2021](#)) as subroutine
  - 7:    $\diamond$  RiemaconSC is the strongly convex version of [Algorithm 1](#) in [Theorem 2.2](#) (cf. [its proof](#)).
  - 8: **end for**
  - 9: **return**  $x_T$ .
- 

### 3 CONCLUSION AND FUTURE DIRECTIONS

In this work, we pursued an approach that, by designing and making use of inexact Riemannian proximal methods, yielded accelerated optimization algorithms. Consequently we were able to work without an undesirable assumption that most previous methods required, whose potential satisfiability is not clear: that the iterates stay in certain specified geodesically-convex set without enforcing them to be in the set. A future direction of research is the study of whether there are algorithms like ours that incur even lower geometric penalties or that do not incur  $\log(1/\varepsilon)$  factors. Another interesting direction consists of studying generalizations of our approach to more general manifolds, namely the full Hadamard case, and manifolds of non-negative or even of bounded sectional curvature.

## REFERENCES

- P Ahmadi and H Khatibzadeh. On the convergence of inexact proximal point algorithm on hadamard manifolds. *Taiwanese Journal of Mathematics*, 18(2):419–433, 2014. URL <https://doi.org/10.11650/tjm.18.2014.3066>.
- Kwangjun Ahn and Suvrit Sra. From Nesterov’s estimate sequence to Riemannian acceleration. *arXiv preprint arXiv:2001.08876*, 2020. URL <https://arxiv.org/abs/2001.08876>.
- Foivos Alimisis, Antonio Orvieto, Gary Bécigneul, and Aurelien Lucchi. A continuous-time perspective for modeling acceleration in Riemannian optimization. *arXiv preprint arXiv:1910.10782*, 2019. URL <https://arxiv.org/abs/1910.10782>.
- Foivos Alimisis, Antonio Orvieto, Gary Bécigneul, and Aurelien Lucchi. Practical accelerated optimization on Riemannian manifolds. *arXiv preprint arXiv:2002.04144*, 2020. URL <https://arxiv.org/abs/2002.04144>.
- Zeyuan Allen-Zhu. Katyusha: The first direct acceleration of stochastic gradient methods. *J. Mach. Learn. Res.*, 18:221:1–221:51, 2017. URL <http://jmlr.org/papers/v18/16-410.html>.
- Zeyuan Allen-Zhu. Natasha 2: Faster non-convex optimization than SGD. In *Advances in Neural Information Processing Systems 31: Annual Conference on Neural Information Processing Systems 2018, NeurIPS 2018, 3-8 December 2018, Montréal, Canada*, pp. 2680–2691, 2018. URL <http://papers.nips.cc/paper/7533-natasha-2-faster-non-convex-optimization-than-sgd>.
- Zeyuan Allen Zhu and Lorenzo Orecchia. Nearly-linear time positive LP solver with faster convergence rate. In *Proceedings of the Forty-Seventh Annual ACM on Symposium on Theory of Computing, STOC 2015, Portland, OR, USA, June 14-17, 2015*, pp. 229–236, 2015. doi: 10.1145/2746539.2746573. URL <https://doi.org/10.1145/2746539.2746573>.
- Zeyuan Allen Zhu and Lorenzo Orecchia. Linear coupling: An ultimate unification of gradient and mirror descent. In *8th Innovations in Theoretical Computer Science Conference, ITCS 2017, January 9-11, 2017, Berkeley, CA, USA*, pp. 3:1–3:22, 2017. doi: 10.4230/LIPIcs.ITCS.2017.3. URL <https://doi.org/10.4230/LIPIcs.ITCS.2017.3>.
- Zeyuan Allen-Zhu, Ankit Garg, Yuanzhi Li, Rafael Oliveira, and Avi Wigderson. Operator scaling via geodesically convex optimization, invariant theory and polynomial identity testing. In *Proceedings of the 50th Annual ACM SIGACT Symposium on Theory of Computing*, pp. 172–181, 2018. URL <https://arxiv.org/abs/1804.01076>.
- Daniel Azagra and Juan Ferrera. Inf-convolution and regularization of convex functions on Riemannian manifolds of nonpositive curvature. *arXiv preprint math/0505496*, 2005. URL <https://arxiv.org/abs/math/0505496>.
- Miroslav Bacák. Convex analysis and optimization in hadamard spaces. In *Convex Analysis and Optimization in Hadamard Spaces*. de Gruyter, 2014. doi: <https://doi.org/10.1515/9783110361629>.
- Amir Beck and Marc Teboulle. A fast iterative shrinkage-thresholding algorithm for linear inverse problems. *SIAM J. Imaging Sci.*, 2(1):183–202, 2009. doi: 10.1137/080716542. URL <https://doi.org/10.1137/080716542>.
- Jonathan Bennett, Anthony Carbery, Michael Christ, and Terence Tao. The brascamp–lieb inequalities: finiteness, structure and extremals. *Geometric and Functional Analysis*, 17(5):1343–1415, 2008.
- GC Bento, OP Ferreira, and PR Oliveira. Proximal point method for a special class of nonconvex functions on hadamard manifolds. *Optimization*, 64(2):289–319, 2015.
- Glaydston de Carvalho Bento, João Xavier da Cruz-Neto, and Paulo Roberto Oliveira. A new approach to the proximal point method: Convergence on general Riemannian manifolds. *J. Optim. Theory Appl.*, 168(3):743–755, 2016. doi: 10.1007/s10957-015-0861-2. URL <https://doi.org/10.1007/s10957-015-0861-2>.

- Glaydston de Carvalho Bento, Orizon P. Ferreira, and Jefferson G. Melo. Iteration-complexity of gradient, subgradient and proximal point methods on Riemannian manifolds. *J. Optim. Theory Appl.*, 173(2):548–562, 2017. doi: 10.1007/s10957-017-1093-4. URL <https://doi.org/10.1007/s10957-017-1093-4>.
- Léopold Cambier and Pierre-Antoine Absil. Robust low-rank matrix completion by Riemannian optimization. *SIAM J. Scientific Computing*, 38(5), 2016. doi: 10.1137/15M1025153. URL <https://doi.org/10.1137/15M1025153>.
- Yair Carmon, John C. Duchi, Oliver Hinder, and Aaron Sidford. "Convex until proven guilty": Dimension-free acceleration of gradient descent on non-convex functions. In *Proceedings of the 34th International Conference on Machine Learning, ICML 2017, Sydney, NSW, Australia, 6-11 August 2017*, pp. 654–663, 2017. URL <http://proceedings.mlr.press/v70/carmon17a.html>.
- Yair Carmon, Arun Jambulapati, Qijia Jiang, Yujia Jin, Yin Tat Lee, Aaron Sidford, and Kevin Tian. Acceleration with a ball optimization oracle. In Hugo Larochelle, Marc’Aurelio Ranzato, Raia Hadsell, Maria-Florina Balcan, and Hsuan-Tien Lin (eds.), *Advances in Neural Information Processing Systems 33: Annual Conference on Neural Information Processing Systems 2020, NeurIPS 2020, December 6-12, 2020, virtual*, 2020. URL <https://proceedings.neurips.cc/paper/2020/hash/dba4c1a117472f6aca95211285d0587e-Abstract.html>.
- Glaydston de Carvalho Bento and Jefferson G. Melo. Subgradient method for convex feasibility on Riemannian manifolds. *J. Optim. Theory Appl.*, 152(3):773–785, 2012. doi: 10.1007/s10957-011-9921-4. URL <https://doi.org/10.1007/s10957-011-9921-4>.
- Shih-Sen Chang, Jen-Chih Yao, M Liu, and LC Zhao. Inertial proximal point algorithm for variational inclusion in hadamard manifolds. *Applicable Analysis*, pp. 1–12, 2021. doi: <https://doi.org/10.1080/00036811.2021.2016719>.
- Anoop Cherian and Suvrit Sra. Riemannian dictionary learning and sparse coding for positive definite matrices. *IEEE Trans. Neural Networks Learn. Syst.*, 28(12):2859–2871, 2017. doi: 10.1109/TNNLS.2016.2601307. URL <https://doi.org/10.1109/TNNLS.2016.2601307>.
- Francisco Criado, David Martínez-Rubio, and Sebastian Pokutta. Fast algorithms for packing proportional fairness and its dual. *arXiv preprint arXiv:2109.03678*, 2021. URL <https://arxiv.org/abs/2109.03678>.
- Chris Criscitiello and Nicolas Boumal. Efficiently escaping saddle points on manifolds. In *Advances in Neural Information Processing Systems 32: Annual Conference on Neural Information Processing Systems 2019, NeurIPS 2019, 8-14 December 2019, Vancouver, BC, Canada*, pp. 5985–5995, 2019. URL <http://papers.nips.cc/paper/8832-efficiently-escaping-saddle-points-on-manifolds>.
- Chris Criscitiello and Nicolas Boumal. An accelerated first-order method for non-convex optimization on manifolds. *arXiv preprint arXiv:2008.02252*, 2020. URL <https://arxiv.org/abs/2008.02252>.
- Christopher Criscitiello and Nicolas Boumal. Negative curvature obstructs acceleration for geodesically convex optimization, even with exact first-order oracles. *CoRR*, abs/2111.13263, 2021. URL <https://arxiv.org/abs/2111.13263>.
- João Xavier da Cruz Neto, Orizon Pereira Ferreira, L. R. Lucambio Pérez, and Sándor Zoltán Németh. Convex- and monotone-transformable mathematical programming problems and a proximal-like point method. *J. Glob. Optim.*, 35(1):53–69, 2006. doi: 10.1007/s10898-005-6741-9. URL <https://doi.org/10.1007/s10898-005-6741-9>.
- Jelena Diakonikolas and Lorenzo Orecchia. Accelerated extra-gradient descent: A novel accelerated first-order method. In *9th Innovations in Theoretical Computer Science Conference, ITCS 2018, January 11-14, 2018, Cambridge, MA, USA*, pp. 23:1–23:19, 2018. doi: 10.4230/LIPIcs.ITCS.2018.23. URL <https://doi.org/10.4230/LIPIcs.ITCS.2018.23>.
- Jelena Diakonikolas and Lorenzo Orecchia. The approximate duality gap technique: A unified theory of first-order methods. *SIAM Journal on Optimization*, 29(1):660–689, 2019. doi: 10.1137/18M1172314. URL <https://doi.org/10.1137/18M1172314>.

- Yoel Drori and Marc Teboulle. Performance of first-order methods for smooth convex minimization: a novel approach. *Math. Program.*, 145(1-2):451–482, 2014. doi: 10.1007/s10107-013-0653-0. URL <https://doi.org/10.1007/s10107-013-0653-0>.
- Alan Edelman, Tomás A. Arias, and Steven Thomas Smith. The geometry of algorithms with orthogonality constraints. *SIAM J. Matrix Analysis Applications*, 20(2):303–353, 1998. doi: 10.1137/S0895479895290954. URL <https://doi.org/10.1137/S0895479895290954>.
- Alexander Gasnikov, Pavel E. Dvurechensky, Eduard A. Gorbunov, Evgeniya A. Vorontsova, Daniil Selikhanovych, César A. Uribe, Bo Jiang, Haoyue Wang, Shuzhong Zhang, Sébastien Bubeck, Qijia Jiang, Yin Tat Lee, Yuanzhi Li, and Aaron Sidford. Near optimal methods for minimizing convex functions with lipschitz  $\rho$ -th derivatives. In *Conference on Learning Theory, COLT 2019, 25-28 June 2019, Phoenix, AZ, USA*, pp. 1392–1393, 2019. URL <http://proceedings.mlr.press/v99/gasnikov19b.html>.
- Matthieu Genicot, Wen Huang, and Nikolay T. Trendafilov. Weakly correlated sparse components with nearly orthonormal loadings. In *Geometric Science of Information - Second International Conference, GSI 2015, Palaiseau, France, October 28-30, 2015, Proceedings*, pp. 484–490, 2015. doi: 10.1007/978-3-319-25040-3\_52. URL [https://doi.org/10.1007/978-3-319-25040-3\\_52](https://doi.org/10.1007/978-3-319-25040-3_52).
- Linus Hamilton and Ankur Moitra. A no-go theorem for acceleration in the hyperbolic plane. *arXiv preprint arXiv:2101.05657*, 2021. URL <https://arxiv.org/abs/2101.05657>.
- Gennadij Heidel and Volker Schulz. A Riemannian trust-region method for low-rank tensor completion. *Numerical Lin. Alg. with Applic.*, 25(6), 2018. doi: 10.1002/nla.2175. URL <https://doi.org/10.1002/nla.2175>.
- Oliver Hinder, Aaron Sidford, and Nimit Sharad Sohoni. Near-optimal methods for minimizing star-convex functions and beyond. *CoRR*, abs/1906.11985, 2019. URL <http://arxiv.org/abs/1906.11985>.
- Reshad Hosseini and Suvrit Sra. Matrix manifold optimization for gaussian mixtures. In *Advances in Neural Information Processing Systems 28: Annual Conference on Neural Information Processing Systems 2015, December 7-12, 2015, Montreal, Quebec, Canada*, pp. 910–918, 2015. URL <http://papers.nips.cc/paper/5812-matrix-manifold-optimization-for-gaussian-mixtures>.
- Reshad Hosseini and Suvrit Sra. An alternative to EM for gaussian mixture models: Batch and stochastic Riemannian optimization. *CoRR*, abs/1706.03267, 2017. URL <http://arxiv.org/abs/1706.03267>.
- Reshad Hosseini and Suvrit Sra. Recent advances in stochastic Riemannian optimization. *Handbook of Variational Methods for Nonlinear Geometric Data*, pp. 527–554, 2020.
- Wen Huang and Ke Wei. Extending FISTA to Riemannian optimization for sparse PCA. *arXiv preprint arXiv:1909.05485*, 2019a. URL <https://arxiv.org/abs/1909.05485>.
- Wen Huang and Ke Wei. Riemannian proximal gradient methods. *arXiv preprint arXiv:1909.06065*, 2019b. URL <https://arxiv.org/abs/1909.06065>.
- Anastasiya Ivanova, Dmitry Pasechnyuk, Dmitry Grishchenko, Egor Shulgin, Alexander V. Gasnikov, and Vladislav Matyukhin. Adaptive catalyst for smooth convex optimization. In Nicholas N. Olenov, Yuri G. Evtushenko, Miloja Jacimovic, Michael Yu. Khachay, and Vlasta Malkova (eds.), *Optimization and Applications - 12th International Conference, OPTIMA 2021, Petrovac, Montenegro, September 27 - October 1, 2021, Proceedings*, volume 13078 of *Lecture Notes in Computer Science*, pp. 20–37. Springer, 2021. doi: 10.1007/978-3-030-91059-4\_2. URL [https://doi.org/10.1007/978-3-030-91059-4\\_2](https://doi.org/10.1007/978-3-030-91059-4_2).
- Jikai Jin and Suvrit Sra. A Riemannian accelerated proximal extragradient framework and its implications. *CoRR*, abs/2111.02763, 2021. URL <https://arxiv.org/abs/2111.02763>.
- Ian T Jolliffe, Nikolay T Trendafilov, and Mudassir Uddin. A modified principal component technique based on the lasso. *Journal of computational and Graphical Statistics*, 12(3):531–547, 2003. URL <https://doi.org/10.1198/1061860032148>.

- Pooria Joulani, Anant Raj, András György, and Csaba Szepesvári. A simpler approach to accelerated optimization: iterative averaging meets optimism. In *Proceedings of the 37th International Conference on Machine Learning, ICML 2020, 13-18 July 2020, Virtual Event*, volume 119 of *Proceedings of Machine Learning Research*, pp. 4984–4993. PMLR, 2020. URL <http://proceedings.mlr.press/v119/joulani20a.html>.
- Dmitry Kamzolov and Alexander Gasnikov. Near-optimal hyperfast second-order method for convex optimization and its sliding. *arXiv preprint arXiv:2002.09050*, 2020. URL <https://arxiv.org/abs/2002.09050>.
- HiroYuki Kasai, Pratik Jawanpuria, and Bamdev Mishra. Riemannian adaptive stochastic gradient algorithms on matrix manifolds. In *Proceedings of the 36th International Conference on Machine Learning, ICML 2019, 9-15 June 2019, Long Beach, California, USA*, pp. 3262–3271, 2019. URL <http://proceedings.mlr.press/v97/kasai19a.html>.
- Konrawut Khammahawong, Poom Kumam, Parin Chaipunya, and Juan Martínez-Moreno. Tseng’s methods for inclusion problems on hadamard manifolds. *Optimization*, pp. 1–35, 2021. URL <https://doi.org/10.1080/02331934.2021.1940179>.
- Masoud Badiel Khuzani and Na Li. Stochastic primal-dual method on Riemannian manifolds of bounded sectional curvature. In *16th IEEE International Conference on Machine Learning and Applications, ICMLA 2017, Cancun, Mexico, December 18-21, 2017*, pp. 133–140, 2017. doi: 10.1109/ICMLA.2017.0-167. URL <https://doi.org/10.1109/ICMLA.2017.0-167>.
- Jungbin Kim and Insoon Yang. Accelerated gradient methods for geodesically convex optimization: Tractable algorithms and convergence analysis. In Kamalika Chaudhuri, Stefanie Jegelka, Le Song, Csaba Szepesvári, Gang Niu, and Sivan Sabato (eds.), *International Conference on Machine Learning, ICML 2022, 17-23 July 2022, Baltimore, Maryland, USA*, volume 162 of *Proceedings of Machine Learning Research*, pp. 11255–11282. PMLR, 2022. URL <https://proceedings.mlr.press/v162/kim22k.html>.
- Tullio Levi-Civita. *The absolute differential calculus (calculus of tensors)*. Courier Corporation, 1977. ISBN 978-0-486-31625-3.
- Mario Lezcano-Casado. Curvature-dependant global convergence rates for optimization on manifolds of bounded geometry. *arXiv preprint arXiv:2008.02517*, 2020. URL <https://arxiv.org/abs/2008.02517>.
- Mario Lezcano-Casado and David Martínez-Rubio. Cheap orthogonal constraints in neural networks: A simple parametrization of the orthogonal and unitary group. In *Proceedings of the 36th International Conference on Machine Learning, ICML 2019, 9-15 June 2019, Long Beach, California, USA*, pp. 3794–3803, 2019. URL <http://proceedings.mlr.press/v97/lezcano-casado19a.html>.
- Hongzhou Lin, Julien Mairal, and Zaïd Harchaoui. Catalyst acceleration for first-order convex optimization: from theory to practice. *J. Mach. Learn. Res.*, 18:212:1–212:54, 2017. URL <http://jmlr.org/papers/v18/17-748.html>.
- Lizhen Lin, Bayan Saparbayeva, Michael Minyi Zhang, and David B. Dunson. Accelerated algorithms for convex and non-convex optimization on manifolds. *CoRR*, abs/2010.08908, 2020. URL <https://arxiv.org/abs/2010.08908>.
- Yuanyuan Liu, Fanhua Shang, James Cheng, Hong Cheng, and Licheng Jiao. Accelerated first-order methods for geodesically convex optimization on Riemannian manifolds. In Isabelle Guyon, Ulrike von Luxburg, Samy Bengio, Hanna M. Wallach, Rob Fergus, S. V. N. Vishwanathan, and Roman Garnett (eds.), *Advances in Neural Information Processing Systems 30: Annual Conference on Neural Information Processing Systems 2017, 4-9 December 2017, Long Beach, CA, USA*, pp. 4868–4877, 2017. URL <https://papers.nips.cc/paper/2017/hash/6ef80bb237adf4b6f77d0700e1255907-Abstract.html>.
- David Martínez-Rubio. Global Riemannian acceleration in hyperbolic and spherical spaces. *arXiv preprint arXiv:2012.03618*, 2020. URL <https://arxiv.org/abs/2012.03618>.



- David Martínez-Rubio. *Acceleration in first-order optimization methods: promenading beyond convexity or smoothness, and applications*. PhD thesis, University of Oxford, 2021.
- Bamdev Mishra and Rodolphe Sepulchre. R3MC: A Riemannian three-factor algorithm for low-rank matrix completion. In *53rd IEEE Conference on Decision and Control, CDC 2014, Los Angeles, CA, USA, December 15-17, 2014*, pp. 1137–1142, 2014. doi: 10.1109/CDC.2014.7039534. URL <https://doi.org/10.1109/CDC.2014.7039534>.
- Yurii Nesterov. A method of solving a convex programming problem with convergence rate  $\mathcal{O}(1/k^2)$ . In *Soviet Mathematics Doklady*, volume 27, pp. 372–376, 1983. URL <http://www.mathnet.ru/links/97a4ab44817d9e795c45e0d5e8a46d64/dan46009.pdf>.
- Yurii Nesterov. Smooth minimization of non-smooth functions. *Math. Program.*, 103(1):127–152, 2005. doi: 10.1007/s10107-004-0552-5. URL <https://doi.org/10.1007/s10107-004-0552-5>.
- Peter Petersen. *Riemannian geometry*, volume 171. Springer, 2006. ISBN 978-0-387-29403-2.
- Hiroiyuki Sato, Hiroiyuki Kasai, and Bamdev Mishra. Riemannian stochastic variance reduced gradient. *CoRR*, abs/1702.05594, 2017. URL <http://arxiv.org/abs/1702.05594>.
- Hiroiyuki Sato, Hiroiyuki Kasai, and Bamdev Mishra. Riemannian stochastic variance reduced gradient algorithm with retraction and vector transport. *SIAM Journal on Optimization*, 29(2):1444–1472, 2019. doi: 10.1137/17M1116787. URL <https://doi.org/10.1137/17M1116787>.
- Weijie Su, Stephen P. Boyd, and Emmanuel J. Candès. A differential equation for modeling nesterov’s accelerated gradient method: Theory and insights. *J. Mach. Learn. Res.*, 17:153:1–153:43, 2016. URL <http://jmlr.org/papers/v17/15-084.html>.
- Ju Sun, Qing Qu, and John Wright. Complete dictionary recovery over the sphere II: recovery by Riemannian trust-region method. *IEEE Trans. Inf. Theory*, 63(2):885–914, 2017. doi: 10.1109/TIT.2016.2632149. URL <https://doi.org/10.1109/TIT.2016.2632149>.
- Yue Sun, Nicolas Flammarion, and Maryam Fazel. Escaping from saddle points on Riemannian manifolds. In *Advances in Neural Information Processing Systems 32: Annual Conference on Neural Information Processing Systems 2019, NeurIPS 2019, 8-14 December 2019, Vancouver, BC, Canada*, pp. 7274–7284, 2019. URL <http://papers.nips.cc/paper/8948-escaping-from-saddle-points-on-riemannian-manifolds>.
- Mingkui Tan, Ivor W. Tsang, Li Wang, Bart Vandereycken, and Sinno Jialin Pan. Riemannian pursuit for big matrix recovery. In *Proceedings of the 31th International Conference on Machine Learning, ICML 2014, Beijing, China, 21-26 June 2014*, pp. 1539–1547, 2014. URL <http://proceedings.mlr.press/v32/tan14.html>.
- Guo-ji Tang and Nan-Jing Huang. Rate of convergence for proximal point algorithms on hadamard manifolds. *Oper. Res. Lett.*, 42(6-7):383–387, 2014. doi: 10.1016/j.orl.2014.06.009. URL <https://doi.org/10.1016/j.orl.2014.06.009>.
- Nilesh Tripurani, Nicolas Flammarion, Francis Bach, and Michael I. Jordan. Averaging stochastic gradient descent on Riemannian manifolds. *CoRR*, abs/1802.09128, 2018. URL <http://arxiv.org/abs/1802.09128>.
- Paul Tseng. On accelerated proximal gradient methods for convex-concave optimization. *submitted to SIAM Journal on Optimization*, 2(3), 2008. URL <https://www.mit.edu/~dimitrib/PTseng/papers/apgm.pdf>.
- Bart Vandereycken. Low-rank matrix completion by Riemannian optimization. *SIAM Journal on Optimization*, 23(2):1214–1236, 2013. doi: 10.1137/110845768. URL <https://doi.org/10.1137/110845768>.
- Di Wang, Satish Rao, and Michael W. Mahoney. Unified acceleration method for packing and covering problems via diameter reduction. In *43rd International Colloquium on Automata, Languages, and Programming, ICALP 2016, July 11-15, 2016, Rome, Italy*, pp. 50:1–50:13, 2016a. doi: 10.4230/LIPIcs.ICALP.2016.50. URL <https://doi.org/10.4230/LIPIcs.ICALP.2016.50>.

- Jinhua Wang, Chong Li, Genaro López-Acedo, and Jen-Chih Yao. Convergence analysis of inexact proximal point algorithms on hadamard manifolds. *J. Glob. Optim.*, 61(3):553–573, 2015. doi: 10.1007/s10898-014-0182-2. URL <https://doi.org/10.1007/s10898-014-0182-2>.
- Jinhua Wang, Chong Li, Genaro López-Acedo, and Jen-Chih Yao. Proximal point algorithms on hadamard manifolds: Linear convergence and finite termination. *SIAM J. Optim.*, 26(4):2696–2729, 2016b. doi: 10.1137/15M1051257. URL <https://doi.org/10.1137/15M1051257>.
- Melanie Weber and Suvrit Sra. Frank-wolfe methods for geodesically convex optimization with application to the matrix geometric mean. *CoRR*, abs/1710.10770, 2017. URL <http://arxiv.org/abs/1710.10770>.
- Melanie Weber and Suvrit Sra. Nonconvex stochastic optimization on manifolds via Riemannian Frank-Wolfe methods. *CoRR*, abs/1910.04194, 2019. URL <http://arxiv.org/abs/1910.04194>.
- Ke Wei, Jian-Feng Cai, Tony F Chan, and Shingyu Leung. Guarantees of Riemannian optimization for low rank matrix completion. *arXiv preprint arXiv:1603.06610*, 2016. URL <https://arxiv.org/abs/1603.06610>.
- Andre Wibisono, Ashia C. Wilson, and Michael I. Jordan. A variational perspective on accelerated methods in optimization. *CoRR*, abs/1603.04245, 2016. URL <http://arxiv.org/abs/1603.04245>.
- Ami Wiesel. Geodesic convexity and covariance estimation. *IEEE Trans. Signal Process.*, 60(12): 6182–6189, 2012. doi: 10.1109/TSP.2012.2218241. URL <https://doi.org/10.1109/TSP.2012.2218241>.
- Hongyi Zhang and Suvrit Sra. First-order methods for geodesically convex optimization. In *Proceedings of the 29th Conference on Learning Theory, COLT 2016, New York, USA, June 23-26, 2016*, pp. 1617–1638, 2016. URL <http://proceedings.mlr.press/v49/zhang16b.html>.
- Hongyi Zhang and Suvrit Sra. An estimate sequence for geodesically convex optimization. In Sébastien Bubeck, Vianney Perchet, and Philippe Rigollet (eds.), *Conference On Learning Theory, COLT 2018, Stockholm, Sweden, 6-9 July 2018*, volume 75 of *Proceedings of Machine Learning Research*, pp. 1703–1723. PMLR, 2018. URL <http://proceedings.mlr.press/v75/zhang18a.html>.
- Hongyi Zhang, Sashank J. Reddi, and Suvrit Sra. Riemannian SVRG: fast stochastic optimization on Riemannian manifolds. In *Advances in Neural Information Processing Systems 29: Annual Conference on Neural Information Processing Systems 2016, December 5-10, 2016, Barcelona, Spain*, pp. 4592–4600, 2016. URL <http://papers.nips.cc/paper/6515-riemannian-svrg-fast-stochastic-optimization-on-riemannian-manifolds>.
- Peiyuan Zhang, Jingzhao Zhang, and Suvrit Sra. Minimax in geodesic metric spaces: Sion’s theorem and algorithms. *CoRR*, abs/2202.06950, 2022. URL <https://arxiv.org/abs/2202.06950>.
- Pan Zhou, Xiao-Tong Yuan, and Jiashi Feng. Faster first-order methods for stochastic non-convex optimization on Riemannian manifolds. In *The 22nd International Conference on Artificial Intelligence and Statistics, AISTATS 2019, 16-18 April 2019, Naha, Okinawa, Japan*, pp. 138–147, 2019. URL <http://proceedings.mlr.press/v89/zhoul9a.html>.

## A PROOF OF THEOREM 2.2, ANALYSIS OF ALGORITHM 1

We start by noting a property that our parameters satisfy.

**Lemma A.1.** *For the parameter choices of  $a_k$  and  $A_{k-1}$  in Algorithm 1 we have, for all  $k \geq 1$ :*

$$\frac{8\lambda}{9}(\xi A_{k-1} + a_k) \geq a_k^2 \geq \frac{3\lambda}{4}(\xi A_{k-1} + \xi a_k).$$

*Proof.* It is a simple computation to check that  $a_k$  and  $A_{k-1}$  satisfy such inequality. The inequalities are equivalent to the following, which trivially holds:

$$\begin{aligned} \frac{8}{9}((k^2 - k + 64k\xi - 64\xi + 1000\xi^2) + (2k + 64\xi)) &\geq \frac{4}{5}(k^2 + 64k\xi + 1024\xi^2) \\ &\geq \frac{3}{4}((k^2 - k + 64k\xi - 64\xi + 1000\xi^2) + (2k\xi + 64\xi^2)) \end{aligned}$$

□

We now prove Proposition 2.1, which will allow us to use  $\psi_k$  as a Lyapunov function to show the final convergence rates. The proof will use Lemma A.2 and Lemma A.3, that we state and prove afterwards.

*Proof (Proposition 2.1).* Inequality  $(1 - \Delta_k)\psi_k \leq \psi_{k-1}$  is equivalent to

$$\begin{aligned} (1 - \Delta_k) \left( A_k(f(y_k) - f(\bar{x}^*)) + \frac{1}{2}\|z_k^{y_k} - \bar{x}^*\|_{y_k}^2 + \frac{\xi - 1}{2}\|y_k - z_k^{y_k}\|_{y_k}^2 \right) \\ \leq A_{k-1}(f(y_{k-1}) - f(\bar{x}^*)) + \left( \frac{1}{2}\|z_{k-1}^{y_{k-1}} - \bar{x}^*\|_{y_{k-1}}^2 + \frac{\xi - 1}{2}\|y_{k-1} - z_{k-1}^{y_{k-1}}\|_{y_{k-1}}^2 \right) \end{aligned}$$

which, by bounding  $(1 - \Delta_k)(f(y_k) - f(\bar{x}^*)) \leq f(y_k) - f(\bar{x}^*)$  and reorganizing, is implied by the following:

$$\begin{aligned} A_{k-1}(f(y_k) - f(y_{k-1})) + \frac{a_k}{\xi}(f(y_k) - f(\bar{x}^*)) &\leq \frac{1}{2}\|z_{k-1}^{y_{k-1}} - \bar{x}^*\|_{y_{k-1}}^2 - \frac{1 - \Delta_k}{2}\|z_k^{y_k} - \bar{x}^*\|_{y_k}^2 \\ &\quad + \frac{\xi - 1}{2} \left( \|y_{k-1} - z_{k-1}^{y_{k-1}}\|_{y_{k-1}}^2 - (1 - \Delta_k)\|y_k - z_k^{y_k}\|_{y_k}^2 \right). \end{aligned}$$

We have that due to the projection in Line 12, then  $x_k$  is not very far from any  $p \in \mathcal{X}$ :

$$d(x_k, p) \leq \|x_k - y_{k-1}\|_{y_{k-1}} + d(y_{k-1}, p) \stackrel{\textcircled{1}}{\leq} \|\bar{z}_{k-1}^{y_{k-1}} - y_{k-1}\|_{y_{k-1}} + D \stackrel{\textcircled{2}}{\leq} 2D, \quad (1)$$

where  $\textcircled{1}$  holds by the definition of  $x_k$  and the fact  $y_{k-1}, p \in \mathcal{X}$ , and  $\textcircled{2}$  is due to the projection defining  $\bar{z}_{k-1}^{y_{k-1}}$ . Now we use the first part of Lemma A.2 with both  $x \leftarrow y_{k-1}$  and  $x \leftarrow \bar{x}^*$  and we bound the resulting errors  $\varepsilon_k(\cdot)$  by using the second part of Lemma A.2. We also use Lemma A.3, so it is enough to prove the following:

$$\begin{aligned} A_{k-1}\langle v_k^x, x_k - y_{k-1} \rangle + (a_k/\xi)\langle v_k^x, x_k - z_{k-1}^{x_k} + z_{k-1}^{x_k} - \bar{x}^* \rangle - \frac{4\lambda}{9}(A_{k-1} + a_k/\xi)\|v_k^x\|^2 \\ \leq \frac{1}{2}\|z_{k-1}^{x_k} - \bar{x}^*\|_{x_k}^2 - \frac{1}{2}\|z_k^{x_k} - \bar{x}^*\|_{x_k}^2 + \frac{\xi - 1}{2} \left( \|x_k - z_{k-1}^{x_k}\|_{x_k}^2 - \|x_k - z_k^{x_k}\|_{x_k}^2 \right), \end{aligned}$$

Note that thanks to Lemma A.3 now we have the potentials on the right hand side as expressions in the tangent space of  $x_k$ . Also, note that we have canceled some potentials proportional to  $\Delta_k$  coming from the bound on the error  $\varepsilon_k(\cdot)$ . Now we use that by definition of  $x_k$  we have, for all  $v \in T_{x_k}\mathcal{M}$ ,  $A_{k-1}\langle v, x_k - y_{k-1} \rangle = -a_k\langle v, x_k - z_{k-1}^{x_k} \rangle$ , so we use this fact for  $v = v_k^x$  and use the following identity, that holds by the definition of  $z_k^{x_k} \stackrel{\text{def}}{=} z_{k-1}^{x_k} - \eta_k v_k^x$ :

$$\frac{a_k/\xi}{\eta_k} \langle \eta_k v_k^x, z_{k-1}^{x_k} - \bar{x}^* \rangle = \frac{a_k/\xi}{2\eta_k} \left( \eta_k^2 \|v_k^x\|_{x_k}^2 + \|z_{k-1}^{x_k} - \bar{x}^*\|_{x_k}^2 - \|z_k^{x_k} - \bar{x}^*\|_{x_k}^2 \right).$$

so that, after canceling terms, it is enough to prove:

$$\begin{aligned} & a_k(1 - 1/\xi) \langle -v_k^x, x_k - z_{k-1}^{x_k} \rangle - \frac{a_k(1 - 1/\xi)}{2\eta_k} \eta_k^2 \|v_k^x\|^2 \\ & + \|v_k^x\|^2 \left( -\frac{4}{9} (A_{k-1}\lambda + a_k\lambda/\xi) + \frac{a_k\eta_k}{2} \right) \\ & \leq \frac{\xi - 1}{2} \left( \|x_k - z_{k-1}^{x_k}\|_{x_k}^2 - \|x_k - z_k^{x_k}\|_{x_k}^2 \right), \end{aligned} \quad (2)$$

Now we show that in the previous inequality (2), the first line cancels with the last line. Note that  $(a_k(1 - 1/\xi))/\eta_k = (1 - 1/\xi)/(1/\xi) = \xi - 1$ . Thus, by using again the definition of  $z_k^{x_k}$ , we have:

$$\frac{a_k(1 - 1/\xi)}{\eta_k} \langle -\eta_k v_k^x, x_k - z_{k-1}^{x_k} \rangle = \frac{a_k(1 - 1/\xi)}{2\eta_k} \left( \eta_k^2 \|v_k^x\|_{x_k}^2 + \|x_k - z_{k-1}^{x_k}\|_{x_k}^2 - \|x_k - z_k^{x_k}\|_{x_k}^2 \right).$$

Finally, it only remains to prove:

$$\frac{\|v_k^x\|^2}{2\xi} \cdot \left( -\frac{8}{9} (\xi A_{k-1}\lambda + a_k\lambda) + a_k^2 \right) \leq 0, \quad (3)$$

which holds by [Lemma A.1](#).  $\square$

We now show the two auxiliary lemmas that we used in the previous proof.

**Lemma A.2.** Let  $h_k(x) \stackrel{\text{def}}{=} f(x) + \frac{1}{2\lambda} d(x_k, x)^2$  be the strongly  $g$ -convex function used at step  $k$ , and let  $y_k^* = \arg \min_{y \in \mathcal{X}} h_k(y)$ . Then, for  $y_k \in \mathcal{X}$ , if we let  $v_k^x \stackrel{\text{def}}{=} -\text{Log}_{x_k}(y_k)/\lambda$ , then the following holds, for all  $x \in \mathcal{X}$ :

$$f(x) \geq f(y_k) + \langle v_k^x, x - x_k \rangle_{x_k} + \frac{\lambda}{2} \|v_k^x\|^2 - \varepsilon_k(x)$$

where  $\varepsilon_k(x) \stackrel{\text{def}}{=} -\frac{1}{\lambda} \langle y_k - y_k^*, x - x_k \rangle_{x_k} + (h_k(y_k) - h_k(y_k^*))$ . Moreover, if  $y_k$  satisfies

$$h_k(y_k) - h_k(y_k^*) \leq \frac{\Delta_k d(x_k, y_k^*)^2}{78\lambda},$$

then we have

$$\begin{aligned} & -\frac{\lambda}{2} \|v_k^x\|^2 (A_{k-1} + a_k/\xi) + a_k \varepsilon_k(\bar{x}^*)/\xi + A_{k-1} \varepsilon_k(y_{k-1}) \\ & \leq -\frac{4\lambda \|v_k^x\|^2}{9} (A_{k-1} + a_k/\xi) + \frac{\Delta_k}{2} \left( \|\bar{x}^* - z_{k-1}^{x_k}\|_{x_k}^2 + (\xi - 1) \|x_k - z_{k-1}^{x_k}\|_{x_k}^2 \right). \end{aligned}$$

*Proof.* The function  $h_k$  is  $\frac{1}{\lambda}$ -strongly  $g$ -convex because by [Fact 1.2](#) the function  $\frac{1}{2} d(x_k, x)^2$  is 1-strongly  $g$ -convex in a Hadamard manifold. By the first-order optimality condition of  $h_k$  at  $y_k^*$  we have that  $\tilde{v}_k^y \stackrel{\text{def}}{=} \lambda^{-1} \text{Log}_{y_k^*}(x_k) \in \partial(f + I_{\mathcal{X}})(y_k^*)$  is a subgradient of  $f + I_{\mathcal{X}}$  at  $y_k^*$ . Thus, we have, for all  $x \in \mathcal{X}$  and for  $\tilde{v}_k^x \stackrel{\text{def}}{=} \Gamma_{y_k^*}^{x_k}(\tilde{v}_k^y)$ :

$$\begin{aligned} f(x) & \stackrel{\textcircled{1}}{\geq} f(y_k^*) + \langle \tilde{v}_k^y, x - y_k^* \rangle_{y_k^*} \\ & \stackrel{\textcircled{2}}{\geq} f(y_k^*) + \langle \tilde{v}_k^x, x - x_k \rangle_{x_k} + \lambda \|\tilde{v}_k^x\|^2 \\ & \stackrel{\textcircled{3}}{=} f(y_k) + \langle v_k^x, x - x_k \rangle_{x_k} + \frac{\lambda}{2} \|v_k^x\|^2 + \frac{\lambda}{2} \|\tilde{v}_k^x\|^2 \\ & \quad + \langle \tilde{v}_k^x - v_k^x, x - x_k \rangle_{x_k} + \left( (f(y_k^*) + \frac{\lambda}{2} \|\tilde{v}_k^x\|^2) - (f(y_k) + \frac{\lambda}{2} \|v_k^x\|^2) \right) \\ & \stackrel{\textcircled{4}}{\geq} f(y_k) + \langle v_k^x, x - x_k \rangle_{x_k} + \frac{\lambda}{2} \|v_k^x\|^2 + \frac{1}{\lambda} \langle y_k - y_k^*, x - x_k \rangle_{x_k} - (h_k(y_k) - h_k(y_k^*)) \end{aligned}$$

where ① holds because  $\tilde{v}_k^y \in \partial(f + I_{\mathcal{X}})(y_k^*)$  and  $x, y_k^* \in \mathcal{X}$ . In ②, we used the first part of [Lemma C.5](#) along with  $\bar{\delta} = 1$ . We just added and subtracted some terms in ③, and in ④, we dropped  $\frac{\lambda}{2} \|\tilde{v}_k^x\|^2$ , and we used the definitions of  $h_k$ ,  $\tilde{v}_k^x$ , and  $v_k^x = -\text{Log}_{x_k}(y_k)/\lambda$ .

Now we proceed to prove the second part. The following holds:

$$\begin{aligned}
& -\frac{a_k}{\lambda\xi} \langle y_k - y_k^*, \bar{x}^* - x_k \rangle_{x_k} - A_{k-1} \frac{1}{\lambda} \langle y_k - y_k^*, y_{k-1} - x_k \rangle_{x_k} \\
& \stackrel{\textcircled{1}}{\leq} \frac{1}{\lambda} \|y_k - y_k^*\|_{x_k} \cdot \left\| \frac{a_k}{\xi} \bar{x}^* + A_{k-1} y_{k-1} - \left( \frac{a_k}{\xi} + A_{k-1} \right) x_k \right\|_{x_k} \\
& \stackrel{\textcircled{2}}{\leq} \frac{1}{\lambda} d(y_k, y_k^*) \cdot \frac{a_k}{\xi} \|\bar{x}^* - z_{k-1}^{x_k} + (\xi - 1)(x_k - z_{k-1}^{x_k})\|_{x_k} \\
& \stackrel{\textcircled{3}}{\leq} \frac{1}{\lambda} \sqrt{2\lambda(h_k(y_k) - h_k(y_k^*))} \cdot \frac{a_k}{\xi} \sqrt{\xi} \sqrt{\|\bar{x}^* - z_{k-1}^{x_k}\|_{x_k}^2 + (\xi - 1)\|(x_k - z_{k-1}^{x_k})\|_{x_k}^2} \\
& = \sqrt{\frac{2a_k^2(h_k(y_k) - h_k(y_k^*))}{\Delta_k \lambda \xi}} \cdot \sqrt{\Delta_k} \sqrt{\|\bar{x}^* - z_{k-1}^{x_k}\|_{x_k}^2 + (\xi - 1)\|(x_k - z_{k-1}^{x_k})\|_{x_k}^2} \\
& \stackrel{\textcircled{4}}{\leq} \frac{a_k^2(h_k(y_k) - h_k(y_k^*))}{\Delta_k \lambda \xi} + \frac{\Delta_k}{2} (\|\bar{x}^* - z_{k-1}^{x_k}\|_{x_k}^2 + (\xi - 1)\|(x_k - z_{k-1}^{x_k})\|_{x_k}^2),
\end{aligned} \tag{4}$$

where ① groups some terms and uses Cauchy-Schwartz. In inequality ②, for the first term we bounded the distance between  $y_k^*$  and  $y_k$  estimated from  $T_{x_k} \mathcal{M}$  by the actual distance, which is a property that holds in Hadamard manifolds and it holds by the first part of [Corollary C.2](#) with  $\bar{\delta} = 1$ ,  $p \leftarrow y_k^*$ ,  $y \leftarrow y_k$ ,  $x \leftarrow x_k$ ,  $z^y \leftarrow 0$ . The second term is substituted by a term of equal value by using Euclidean trigonometry in  $T_{x_k} \mathcal{M}$ , as in the following. Let  $w \stackrel{\text{def}}{=} \frac{1}{a_k/\xi + A_{k-1}} \left( \frac{a_k}{\xi} \text{Log}_{x_k}(\bar{x}^*) + A_{k-1} \text{Log}_{x_k}(y_{k-1}) \right)$  and let  $u \in T_{x_k}$  be the point in the line containing  $\text{Log}_{x_k}(y_{k-1})$  and  $0 = \text{Log}_{x_k}(x_k) \in T_{x_k}$  such that the triangle with vertices  $0$ ,  $\text{Log}_{x_k}(y_{k-1})$  and  $w$  and the triangle with vertices  $u$ ,  $\text{Log}_{x_k}(y_{k-1})$  and  $\text{Log}_{x_k}(\bar{x}^*)$  are similar triangles, and so

$$\frac{\|\text{Log}_{x_k}(\bar{x}^*) - u\|}{\|w - \text{Log}_{x_k}(x_k)\|} \stackrel{\textcircled{5}}{=} \frac{\|\text{Log}_{x_k}(\bar{x}^*) - \text{Log}_{x_k}(y_{k-1})\|}{\|w - \text{Log}_{x_k}(y_{k-1})\|} \stackrel{\textcircled{6}}{=} \frac{A_{k-1} + a_k/\xi}{a_k/\xi}. \tag{5}$$

We used the triangle similarity in ⑤ and in ⑥ we used the definition of  $w$  as a convex combination of  $\text{Log}_{x_k}(\bar{x}^*)$  and  $\text{Log}_{x_k}(y_{k-1})$ . It is enough to show  $u = \xi z_{k-1}^{x_k}$  as in such a case what we applied in ② is equivalent to the equality (5) above. By the definition of  $x_k$ , we have ⑦ below and by triangle similarity we have ⑧ below:

$$z_{k-1}^{x_k} \stackrel{\textcircled{7}}{=} -\frac{A_{k-1}}{a_k} \text{Log}_{x_k}(y_{k-1}) \stackrel{\textcircled{8}}{=} \frac{A_{k-1}}{a_k} \cdot \frac{a_k/\xi}{A_{k-1}} u = \frac{1}{\xi} u,$$

as desired. In the next inequality ③, we used that by  $(1/\lambda)$ -strong g-convexity of  $h_k$  and by optimality of  $y_k^*$ , we have  $\frac{1}{2\lambda} d(\cdot, y_k^*)^2 \leq h_k(\cdot) - h_k(y_k^*)$ . For the second term, we used that for vectors  $b, c \in \mathbb{R}^n$  and  $\omega \in \mathbb{R}_{\geq 0}$ , we have, by Young's inequality,  $\|b + wc\| = \sqrt{\|b\|^2 + \omega^2\|c\|^2 + 2\langle \sqrt{\omega}b, \sqrt{\omega}c \rangle} \leq \sqrt{(1 + \omega)(\|b\|^2 + \omega\|c\|^2)}$ . In ④ we used Young's inequality.

Before we conclude, we note that

$$d(x_k, y_k^*) \leq \sqrt{2} d(x_k, y_k), \tag{6}$$

which is implied by the following, where we use the same as in ③ above, the assumption on  $y_k$  and  $\Delta_k \leq 1$ :

$$\begin{aligned}
d(x_k, y_k^*) & \leq d(x_k, y_k) + d(y_k, y_k^*) \leq d(x_k, y_k) + \sqrt{2\lambda(h_k(y_k) - h_k(y_k^*))} \\
& \leq d(x_k, y_k) + \sqrt{\Delta_k/34} \cdot d(x_k, y_k^*) \leq d(x_k, y_k) + d(x_k, y_k^*)/4.
\end{aligned}$$



Finally, we can make use of (4) and (6) to obtain the claim in the second part of the lemma:

$$\begin{aligned}
& -\frac{\lambda}{2}\|v_k^x\|^2(A_{k-1} + a_k/\xi) + a_k\varepsilon_k(\bar{x}^*)/\xi + A_{k-1}\varepsilon_k(y_{k-1}) - \frac{\Delta_k}{2}\|\bar{x}^* - z_{k-1}^{x_k}\|_{x_k}^2 \\
& \quad - \Delta_k \frac{\xi - 1}{2} \|(x_k - z_{k-1}^{x_k})\|_{x_k}^2 \\
& \leq -\frac{\lambda}{2}\|v_k^x\|^2(A_{k-1} + a_k/\xi) + \left(A_{k-1} + a_k/\xi + \frac{a_k^2}{\Delta_k \lambda \xi}\right) (h_k(y_k) - h_k(y_k^*)) \\
& \stackrel{\textcircled{1}}{\leq} -\frac{\lambda}{2}\|v_k^x\|^2(A_{k-1} + a_k/\xi) + (A_{k-1} + a_k/\xi) \left(1 + \frac{a_k^2}{(\xi A_{k-1} + a_k)\lambda}\right) \frac{d(x_k, y_k)^2}{34\lambda} \\
& \stackrel{\textcircled{2}}{\leq} -\frac{\lambda}{2}\|v_k^x\|^2(A_{k-1} + a_k/\xi) + \frac{d(x_k, y_k)^2}{18\lambda} (A_{k-1} + a_k/\xi) \\
& \stackrel{\textcircled{3}}{=} -\frac{4\lambda\|v_k^x\|^2}{9} (A_{k-1} + a_k/\xi),
\end{aligned}$$

where  $\textcircled{1}$  holds by the assumption on  $y_k$ ,  $\Delta_k \leq 1$ , and (6). Inequality  $\textcircled{2}$  uses the upper bound on  $a_k^2$  in Lemma A.1, and  $\textcircled{3}$  uses the definition  $v_k^x \stackrel{\text{def}}{=} -\text{Log}_{x_k}(y_k)/\lambda$ .  $\square$

The following lemma allows to *move* the regularized lower bounds on the objective without incurring extra geometric penalties.

**Lemma A.3 (Translating Potentials with no Geometric Penalty).** *Using the variables in Algorithm 1, for any  $\Delta_k \in [0, 1)$ , we have*

$$\begin{aligned}
& \|z_{k-1}^{x_k} - \bar{x}^*\|_{x_k}^2 - (1 - \Delta_k)\|z_k^{x_k} - \bar{x}^*\|_{x_k}^2 + (\xi - 1) \left( \|x_k - z_{k-1}^{x_k}\|_{x_k}^2 - (1 - \Delta_k)\|x_k - z_k^{x_k}\|_{x_k}^2 \right) \\
& \leq \|z_{k-1}^{y_{k-1}} - \bar{x}^*\|_{y_{k-1}}^2 - (1 - \Delta_k)\|z_k^{y_{k-1}} - \bar{x}^*\|_{y_k}^2 \\
& \quad + (\xi - 1) \left( \|y_{k-1} - z_{k-1}^{y_{k-1}}\|_{y_{k-1}}^2 - (1 - \Delta_k)\|y_k - z_k^{y_{k-1}}\|_{y_k}^2 \right).
\end{aligned}$$

*Proof.* Firstly, by the projection step in Line 12, we have

$$\|z_{k-1}^{y_{k-1}} - \bar{x}^*\|_{y_k}^2 \geq \|\bar{z}_{k-1}^{y_{k-1}} - \bar{x}^*\|_{y_k}^2 \quad \text{and} \quad (\xi - 1)\|z_{k-1}^{y_{k-1}}\|_{y_k}^2 \geq (\xi - 1)\|\bar{z}_{k-1}^{y_{k-1}}\|_{y_k}^2 \quad (7)$$

since the operation is a simple Euclidean projection onto the closed ball  $\bar{B}(0, D)$  in  $T_{y_k}\mathcal{M}$ . By the second part of Corollary C.2,  $y = x_k$  and  $x = y_{k-1}$  and by (1), we have  $\textcircled{1}$  below

$$\begin{aligned}
& \|\bar{z}_{k-1}^{y_{k-1}} - \bar{x}^*\|_{y_{k-1}}^2 + (\xi - 1)\|\bar{z}_{k-1}^{y_{k-1}}\|_{y_{k-1}}^2 \stackrel{\textcircled{1}}{\geq} \|z_{k-1}^{x_k} - \bar{x}^*\|_{x_k}^2 + (\zeta_{2D} - 1)\|z_{k-1}^{x_k}\|_{x_k}^2 + (\xi - \zeta_{2D})\|\bar{z}_{k-1}^{y_{k-1}}\|_{y_{k-1}}^2 \\
& \stackrel{\textcircled{2}}{\geq} \|z_{k-1}^{x_k} - \bar{x}^*\|_{x_k}^2 + (\xi - 1)\|z_{k-1}^{x_k}\|_{x_k}^2 + (\xi - \zeta_{2D}) \left( \left( \frac{A_{k-1} + a_k}{A_{k-1}} \right)^2 - 1 \right) \|z_{k-1}^{x_k}\|_{x_k}^2 \\
& \stackrel{\textcircled{3}}{\geq} \|z_{k-1}^{x_k} - \bar{x}^*\|_{x_k}^2 + (\xi - 1)\|z_{k-1}^{x_k}\|_{x_k}^2 + \frac{3(\xi - 1)}{2} \left( \frac{1}{1 - \tau_k} - 1 \right) \|z_{k-1}^{x_k}\|_{x_k}^2,
\end{aligned} \quad (8)$$

and  $\textcircled{2}$  uses the definition of  $x_k$ . In  $\textcircled{3}$ , we used the definition of  $\xi = 4\zeta_{2D} - 3$  that implies  $\xi - \zeta_{2D} \geq \frac{3}{4}(\xi - 1)$  and for  $\tau_k \stackrel{\text{def}}{=} a_k/(a_k + A_{k-1})$  we have that  $(1 + \frac{a_k}{A_{k-1}})^2 - 1 \geq \frac{2a_k}{A_{k-1}} = 2(\frac{1}{1 - \tau_k} - 1)$ . Now, using the second part of Lemma C.1 with  $y = y_k$ ,  $x = x_k$   $z^x = -\eta_k v_k^x$ ,  $a^x = z_{k-1}^{x_k}$ , so that  $z^x + a^x = z_k^{x_k}$  and  $z^y + a^y = z_k^{y_{k-1}}$  and

$$r = \frac{\|\text{Log}_{x_k}(y_k)\|}{\|z^x\|} = \frac{\lambda\|v_k^x\|}{\eta_k\|v_k^x\|} = \frac{\xi\lambda}{a_k} = \frac{5\xi}{2k + 64\xi} < 5/6 < 1. \quad (9)$$

Note that by the choice of parameters and the fact that  $r < 1$ , the assumptions in [Lemma C.1](#) are satisfied. Thus, the following holds

$$\|z_k^{x_k} - \bar{x}^*\|_{x_k}^2 + (\xi - 1)\|z_k^{x_k}\|_{x_k}^2 + \frac{\xi - 1}{2} \left( \frac{r}{1-r} \right) \|z_{k-1}^{x_k}\|^2 \geq \|z_k^{y_k} - \bar{x}^*\|_{y_k}^2 + (\xi - 1)\|z_k^{y_k}\|_{y_k}^2. \quad (10)$$

Hence, combining (7), (8) and (10) we obtain that it is enough to prove

$$-(1 - \Delta_k) \left( \frac{r}{1-r} \right) + 3 \left( \frac{1}{1-\tau_k} - 1 \right) \geq 0,$$

The proof will be finished if we prove the result for  $\Delta_k = 0$ . If we use this last inequality, and the fact that for  $r \leq 5/6$ , we have  $\frac{r}{1-r} \leq 3 \left( \frac{1}{1-3r/4} - 1 \right)$ , we deduce that it suffices to show  $\tau_k \geq \frac{3}{4}r$  to conclude

$$\frac{r}{1-r} \leq 3 \left( \frac{1}{1-3r/4} - 1 \right) \leq 3 \left( \frac{1}{1-\tau_k} - 1 \right).$$

Such inequality, namely  $\tau_k \geq \frac{3}{4}r$ , is equivalent to  $\frac{a_k^2}{\lambda} \geq \frac{3\xi}{4}(a_k + A_{k-1})$  and it holds by [Lemma A.1](#).  $\square$

Finally, we use [Proposition 2.1](#) to show the final convergence rates.

*Proof (Theorem 2.2).* Given the inequality  $(1 - \Delta_k)\psi_k \leq \psi_{k-1}$ , proven in [Proposition 2.1](#), we can use  $\psi_k$  as a Lyapunov function in order to prove convergence rates of [Algorithm 1](#). It follows straightforwardly by definition of  $\psi_k$ , in the following way

$$\begin{aligned} f(y_k) - f(\bar{x}^*) &\leq \frac{\psi_k}{A_k} \leq \prod_{i=1}^k (1 - \Delta_i)^{-1} \frac{\psi_0}{A_k} \stackrel{\textcircled{1}}{\leq} \frac{2\psi_0}{A_k} \stackrel{\textcircled{2}}{\leq} 2L\bar{R}^2 \left( \frac{A_0}{A_k} + \frac{1}{4LA_k} \right) \\ &= O \left( L\bar{R}^2 \left( \frac{\lambda\xi}{\lambda \left( \frac{k^2 + \xi k}{\xi} + \xi \right)} + \frac{1}{\lambda L \left( \frac{k^2 + \xi k}{\xi} + \xi \right)} \right) \right) \\ &= O \left( L\bar{R}^2 \left( \frac{\xi^2}{k^2 + \xi k + \xi^2} \right) \right) \stackrel{\textcircled{3}}{=} O \left( \frac{L\bar{R}^2}{k^2} \cdot \bar{\zeta}^2 \right). \end{aligned}$$

In  $\textcircled{1}$ , we used  $\prod_{i=1}^k (1 - \Delta_i) = \prod_{i=1}^k \frac{i(i+2)}{(i+1)^2} = \frac{k+2}{2(k+1)} \geq \frac{1}{2}$ . We used smoothness in  $\textcircled{2}$ . Note  $\frac{\xi-1}{2}\|y_0 - z_0^{y_0}\|_{y_0} = 0$  and  $\|z_0^{y_0} - \bar{x}^*\|_{y_0}^2 = \bar{R}^2$ . In  $\textcircled{3}$ , we used  $\xi = O(\bar{\zeta})$  and we dropped some terms in the denominator. This means that the number of iterations is  $O(\bar{\zeta} \sqrt{\frac{L\bar{R}^2}{\varepsilon}})$  if we want the right hand side to be bounded by  $\varepsilon$ .

The algorithm and analysis for strongly g-convex and smooth functions follows directly by applying the reduction in ([Martínez-Rubio, 2020](#), Theorem 7) to [Algorithm 1](#). We denote this algorithm by  $\text{RiemaconSC}(\mathcal{X}, x_0, f, \varepsilon)$ , where  $\mathcal{X}$  is the feasible set,  $x_0$  is the initial point,  $f$  is the function to optimize and  $\varepsilon$  is an optional parameter specifying the desired accuracy. Although the statement of the reduction in this paper assumes a function  $f : \mathcal{M} \rightarrow \mathbb{R}$  to be optimized has a global minimizer in an unconstrained problem, the same proof of this theorem works if we have a  $\mu$ -strongly g-convex and  $L$ -smooth function  $f$  defined over an open set containing a closed geodesically convex set  $\mathcal{X}$  and a minimizer  $\bar{x}^*$  of this function restricted to  $\mathcal{X}$ . The algorithm runs the algorithm for g-convex smooth minimization for  $\text{Time}_{\text{ns}}(L, \mu, R)$ , where this is defined as the number of iterations needed by the non-strongly g-convex algorithm to reach accuracy  $\mu R^2/8$  if the initial distance is upper bounded by  $R$ . In such a case it guaranteed that the distance to the minimizer is reduced by half, and we restart the algorithm and run it again with the initial distance parameter equal to  $R/2$ , and so on. This happens  $O(\log(\mu R^2 \varepsilon))$  times if we want to achieve accuracy  $\varepsilon$  from an initial distance  $\bar{R}$ . Thus, the total complexity in number of iterations can be bounded by  $O(\text{Time}_{\text{ns}}(L, \mu, \bar{R}) \log(\mu R^2/\varepsilon))$ , since all initial distances are  $\leq \bar{R}$ . In our case, since we optimize over the set  $\mathcal{X}$  with diameter  $D$ , so it is  $\text{Time}_{\text{ns}}(L, \mu, R) = O(\bar{\zeta} \sqrt{L/\mu})$ , and the total number of iterations is  $O(\bar{\zeta} \sqrt{L/\mu} \log(\mu R^2/\varepsilon))$ . We note that the reverse reduction in ([Martínez-Rubio, 2020](#)) yields extra geometric penalties but this one does not.  $\square$

## B PROOFS OF PROPOSITION 2.1, THEOREM 2.4, ANALYSIS OF ALGORITHM 2

We start by showing that the iterates of Algorithm 2 stay reasonably bounded, which is crucial in order to bound geometric penalties.

**Proposition B.1.** *The iterates  $x_k$  of Algorithm 2 satisfy  $d(x_k, x^*) \leq 2R$ .*

*Proof.* We first show that the optimizer  $x_k^*$  in the ball  $\mathcal{X}_k$  is no farther than the center of  $\mathcal{X}_k$  to  $x^*$ , that is,  $d(x_k^*, x^*) \leq d(x_{k-1}, x^*)$ . We assume  $x^*$  is not in the ball because otherwise the property holds trivially. The geodesic segment joining  $x_k^*$  and  $x^*$  does not contain any other point of the ball, since otherwise by strong convexity we would have that the function value of one such point would be lower than  $f(x_k^*)$ . This fact implies that the angle between  $\text{Log}_{x_k^*}(x^*)$  and  $\text{Log}_{x_k^*}(x_{k-1})$  is obtuse, and so ① holds below and by using Corollary C.3 we conclude  $d(x_k^*, x^*) \leq d(x_{k-1}, x^*)$ :

$$\begin{aligned} \textcircled{1} \quad 0 &\geq 2\langle \text{Log}_{x_k^*}(x^*), \text{Log}_{x_k^*}(x_{k-1}) \rangle \geq d(x_k^*, x^*)^2 + \delta \cdot d(x_k^*, x_{k-1})^2 - d(x_{k-1}, x^*)^2 \\ &\geq d(x_k^*, x^*)^2 - d(x_{k-1}, x^*)^2. \end{aligned}$$

If instead of optimizing exactly in the ball we obtain a close approximation, the iterates will not get very far from  $x^*$ . Indeed, by  $\mu$ -strong convexity, if  $x_k$  is an  $\varepsilon'$ -minimizer of  $f$  in  $\mathcal{X}_k$ , we have that  $d(x_k^*, x_k) \leq \sqrt{\frac{2\varepsilon'}{\mu}} \leq \frac{R}{T}$ , where we used the definition of  $\varepsilon' = \min\{\frac{D\varepsilon}{8R}, \frac{\mu R^2}{2T^2}\}$  in the last inequality. Consequently, applying the non-expansiveness and this last inequality recursively, we obtain

$$d(x_T, x^*) \leq d(x_T^*, x^*) + d(x_T^*, x_T) \leq d(x_{T-1}, x^*) + \frac{R}{T} \leq \dots \leq d(x_0, x^*) + R \leq 2R.$$

□

Before we prove Theorem 2.4, let's discuss about the initialization of  $D$ . As we explain in Appendix B.1, we can apply the subroutine in (Criscitiello & Boumal, 2021, Section 6) for any value of  $D$  that satisfies (notice  $D$  is twice the radius of the ball):

$$D \leq (46R|\kappa_{\min}|\zeta_{2D})^{-1}, \quad (11)$$

If  $D = 2R$  satisfies the inequality, then the algorithm uses this value. If it is not satisfied, then for any value  $D \geq 0$  that satisfies the inequality it must be  $D < 2R$ , so we assume that this inequality holds for the rest of the argument. Indeed, it is a consequence of the function  $x^2 \coth(x)$  being monotonously increasing for  $x \geq 0$  and that given the definition of  $\zeta_D = D\sqrt{|\kappa_{\min}|} \coth(D\sqrt{|\kappa_{\min}|})$ , we have that inequality (11) is equivalent to  $D^2|\kappa_{\min}| \coth(D\sqrt{|\kappa_{\min}|}) \leq (46R\sqrt{|\kappa_{\min}|})^{-1}$ . In this case, the larger  $D$  is, the faster the algorithm runs. So one could solve the 1-dimensional problem  $D = (46R|\kappa_{\min}|\zeta_D)^{-1}$  on  $D$  in order to obtain the best guarantee. On the other hand, we can provide the simple bound on this 1-dimensional problem  $D = 1/(70R|\kappa_{\min}|)$  which would only lose a constant in the final convergence rates. We show now how this is indeed a bound. Let  $x$  be  $D\sqrt{|\kappa_{\min}|}$ , for some  $D$  satisfying inequality (11) and let  $S$  be the set of all such  $x \geq 0$ . Because we want  $x^2 \coth(x) \leq (46R\sqrt{|\kappa_{\min}|})^{-1}$  and the right hand side is upper bounded by  $\leq 1/(23x)$ , then by monotonicity it must be  $S \subset [0, 1/4]$ . It holds that for this interval the fourth derivative of  $x^2 \coth(x) \leq 0$ , which along with its third order Taylor expansion yields ① below, so the points satisfying ③ below are in  $S$  and we can use  $D = \frac{x}{\sqrt{|\kappa_{\min}|}} = \frac{1}{70R|\kappa_{\min}|} \leq \frac{3}{4 \cdot 46R|\kappa_{\min}|}$  as our simple-to-compute bound:

$$x^2 \coth(x) \stackrel{\textcircled{1}}{\leq} x + \frac{x^3}{3} \stackrel{\textcircled{2}}{\leq} \frac{4}{3}x \stackrel{\textcircled{3}}{\leq} \frac{1}{46R\sqrt{|\kappa_{\min}|}}.$$

where in ② we used  $x < 1$  for all  $x \in S$ . Now, we can proceed to prove the theorem.

*Proof (Theorem 2.4).* If  $D = 2R$ , which is the case in which the condition in Line 1 of Algorithm 2 is satisfied, then we just need to call Algorithm 1 once in the corresponding ball  $\bar{B}(x_0, R)$  and we obtain rates  $\tilde{O}(\zeta^2 \sqrt{\frac{L}{\mu}})$ . So from now on we assume  $D < 2R$ . Let  $T = \lceil \frac{4R}{D} \ln(\frac{LR^2}{\varepsilon}) \rceil$  and let  $\varepsilon' = \min\{\frac{D\varepsilon}{8R}, \frac{\mu R^2}{2T^2}\}$ . Since every time we call Algorithm 1 we do it over a ball of diameter  $D$ , we

still use the notation  $\bar{\zeta} \stackrel{\text{def}}{=} \zeta_D$  to refer to the geometric constant associated to the sets  $\mathcal{X}_k$ , for every  $k \geq 1$ . Recall that we use  $\zeta \stackrel{\text{def}}{=} \zeta_R = R\sqrt{|\kappa_{\min}|} \coth(R\sqrt{|\kappa_{\min}|}) \in [R\sqrt{|\kappa_{\min}|}, R\sqrt{|\kappa_{\min}|} + 1]$ .

By definition, it is  $D \leq (46R|\kappa_{\min}|\bar{\zeta})^{-1}$ . Using  $2R > D$  and  $\bar{\zeta} \in [D\sqrt{|\kappa_{\min}|}, D\sqrt{|\kappa_{\min}|} + 1]$ , we conclude  $D \leq 1/\sqrt[3]{46\sqrt{|\kappa_{\min}|}} \leq 1/\sqrt{|\kappa_{\min}|}$  and  $\bar{\zeta} \leq D\sqrt{|\kappa_{\min}|} + 1 \leq 2$ . Since  $\bar{\zeta} = O(1)$ , the subroutine in Line 8 takes  $\tilde{O}(1)$  gradient oracle calls by the analysis in [Appendix B.1](#) and thus, Line 6 of [Algorithm 2](#) takes  $\tilde{O}(\sqrt{\frac{L}{\mu}} \log(\frac{1}{\varepsilon}))$  gradient oracle calls to optimize in the ball  $\mathcal{X}_k$  of diameter  $D$ , for any  $k$ . Recall that we denote the global optimizer of  $f$  by  $x^*$ . Define the g-convex combination

$$\tilde{x}_k = \text{Exp}_{x_{k-1}} \left( \frac{D}{4R} \text{Log}_{x_{k-1}}(x^*) \right) = \text{Exp}_{x_{k-1}} \left( \left(1 - \frac{D}{4R}\right)x_{k-1} + \frac{D}{4R}x^* \right).$$

Since  $\mathcal{X}_k$  is a ball of radius  $D/2$  and by [Proposition B.1](#), it is  $d(x_k, x^*) \leq 2R$ , we have  $\tilde{x}_k \in \mathcal{X}_k$ . Consequently, we have

$$f(x_k) \stackrel{\textcircled{1}}{\leq} f(\tilde{x}_k) + \varepsilon' \stackrel{\textcircled{2}}{\leq} \left(1 - \frac{D}{4R}\right)f(x_{k-1}) + \frac{D}{4R}f(x^*) + \varepsilon',$$

where  $\textcircled{1}$  is due to the guarantees of the optimization in the ball and the fact that  $\tilde{x}_k \in \mathcal{X}_k$ ,  $\textcircled{2}$  holds due to g-convexity. Subtracting  $f(x^*)$  in both sides and rearranging, we obtain

$$f(x_k) - f(x^*) \leq \left(1 - \frac{D}{4R}\right)(f(x_{k-1}) - f(x^*)) + \varepsilon'.$$

Applying this inequality recursively, we obtain

$$\begin{aligned} f(x_T) - f(x^*) &\leq \left(1 - \frac{D}{4R}\right)^T (f(x_0) - f(x^*)) + \varepsilon' \sum_{i=0}^{T-1} \left(1 - \frac{D}{4R}\right)^i \\ &\stackrel{\textcircled{1}}{\leq} \exp\left(-\frac{DT}{4R}\right) \frac{LR^2}{2} + \frac{4R}{D} \varepsilon' \\ &\leq \frac{\varepsilon}{2} + \frac{\varepsilon}{2} = \varepsilon. \end{aligned}$$

Above, we used  $1 - x \leq \exp(-x)$ , we used smoothness to bound  $f(x_0) - f(x^*) \leq \frac{Ld(x_0, x^*)^2}{2}$ , we bounded  $\sum_{i=0}^{T-1} \left(1 - \frac{D}{4R}\right)^i \leq \sum_{i=0}^{\infty} \left(1 - \frac{D}{4R}\right)^i = \frac{4R}{D}$  and we used the values of  $\varepsilon'$  and  $T$ . Finally, we compute the complexity of this algorithm. We have  $T$  iterations taking  $\tilde{O}(\sqrt{\frac{L}{\mu}})$  gradient oracle queries each. Using the value of  $T$  and  $D$ , we obtain that in total, we call the gradient oracle  $\tilde{O}(\frac{R}{D}\sqrt{\frac{L}{\mu}}) = \tilde{O}(R^2|\kappa_{\min}|\sqrt{\frac{L}{\mu}}) = \tilde{O}(\zeta^2\sqrt{\frac{L}{\mu}})$  times, in both of the suggested initializations for  $D$ , cf. [Algorithm 2](#).

We conclude by studying the case in which  $f$  is not strongly convex. Assume there is a global optimizer  $x^*$  and as before let  $R \geq d(x_0, x^*)$ . Given  $\varepsilon > 0$ , we use the regularizer  $r(x) = \frac{\varepsilon}{2R^2} \Phi_{x_0}(x) = \frac{\varepsilon}{2R^2} d(x_0, x)^2$ . Let  $x_\varepsilon^*$  be the minimizer of  $f + r$ . By [\(Martínez-Rubio, 2020, Lemma 21\)](#), we have  $d(x_0, x_\varepsilon^*) \leq d(x_0, x^*) \leq R$ . We run [Algorithm 2](#) on  $f + r$ , which satisfies that the iterates of the algorithm and the subroutine go no farther than  $2R + D/2 < 3R$  from  $x_\varepsilon^*$ . Indeed, the centers of the balls  $\mathcal{X}_k$  are at a distance at most  $2R$  from  $x_\varepsilon^*$  by [Proposition B.1](#) and each ball has radius  $D/2$ . Recall that we are still optimizing over a Hadamard manifold. So in  $\bar{B}(x_\varepsilon^*, 3R)$ , we have that  $f + r$  is  $(\frac{\varepsilon}{R^2})$ -strongly convex and its smoothness constant is  $\zeta_{3R} \cdot \frac{\varepsilon}{R^2} + L = O(\zeta \cdot \frac{\varepsilon}{R^2} + L)$ , by [Fact 1.2](#). Hence, the algorithm finds an  $\varepsilon/2$  minimizer  $x_{T'}$  of  $f + r$  after  $T' = \tilde{O}(\zeta^2 \sqrt{\zeta + \frac{LR^2}{\varepsilon}})$  queries to the gradient oracle. By definition, it is  $d(x_0, x^*) \leq R$  so  $r(x^*) \leq \frac{\varepsilon}{2R^2} \cdot R^2 = \frac{\varepsilon}{2}$  and thus  $x_{T'}$  is an  $\varepsilon$ -minimizer of  $f$ :

$$f(x_{T'}) \leq f(x_{T'}) + r(x_{T'}) \leq f(x^*) + r(x^*) + \frac{\varepsilon}{2} \leq f(x^*) + \varepsilon.$$

□

## B.1 DETAILS OF THE SUBROUTINE CHOSEN BY ALGORITHM 2 FOR LINE 8 OF ALGORITHM 1

Given a constant  $F$  such that  $\|\nabla \mathfrak{R}\| \leq F$ , in their Proposition 6.1, Criscitiello & Boumal (2021) argue that given an  $L'$ -smooth and  $\mu'$ -strongly  $g$ -convex function in a ball of radius  $r \leq \min\{\frac{\sqrt{\mu'}}{4\sqrt{L'}|\kappa_{\min}|}, \frac{|\kappa_{\min}|}{4F}\}$ <sup>3</sup>, the retraction of the function in the ball to the Euclidean space  $\hat{h}(\cdot) \stackrel{\text{def}}{=} h \circ \text{Exp}_{x_k}(\cdot)$  is strongly convex and smooth with condition number  $\frac{3L'}{\mu'}$ . Here,  $\frac{1}{F}$  is interpreted as  $+\infty$ . They assume that the global minimizer is in this ball, but this fact is only used in order to use  $L'$ -smoothness to bound the Lipschitz constant of the function by  $2rL'$ . In our case, the global optimizer is at a distance at most  $3R$  from any point in any of our balls  $\mathcal{X}_k$ , as argued in the previous section. However, we can bound the Lipschitz constant by other means. The functions we will apply this subroutine to have the form  $h(y) \stackrel{\text{def}}{=} f(y) + \frac{1}{\lambda}d(x, y)^2$ , where  $x$  is a point such that  $d(x, y) \leq 2D$  for all  $y \in \mathcal{X}_k$ , cf. Line 8 in Algorithm 1 and (1). Here  $D = 2r$  is the diameter of  $\mathcal{X}_k$ . Using the value of  $\lambda$ , we have that the smoothness of  $g : y \mapsto \frac{1}{\lambda}d(x, y)^2$  in the ball  $\mathcal{X}_k$  is  $L$  and the global minimizer of this function is at most a distance  $2D = 4r$ . So we can estimate the Lipschitz constant of such an  $h$  as

$$\max_{y \in \mathcal{X}_k} \|\nabla h(y)\| \leq \max_{y \in \mathcal{X}_k} \|\nabla f(y)\| + \max_{y \in \mathcal{X}_k} \|\nabla g(y)\| \leq 6RL + 8rL \leq 14RL,$$

where the last inequality uses  $r \leq R$  which holds by construction of Algorithm 2. Now, it is enough to satisfy the following inequality in Proposition 6.1 in (Criscitiello & Boumal, 2021) in order to have that the Euclidean pulled-back function has condition number of the same order as  $h$ , which is  $O(\bar{\zeta})$  for  $\mathcal{X}_k$ :

$$\frac{7}{9}L'|\kappa_{\min}|r^2 + \frac{3}{2}|\kappa_{\min}|r \max_{y \in \mathcal{X}_k} \|\nabla h(y)\| \leq \frac{\mu'}{2} = \frac{\mu + L/\zeta_{2D}}{2}.$$

Since  $r \leq R$ ,  $\zeta_{2D} \leq 2\zeta_D$ ,  $L' = 2L$  and  $\mu \geq 0$ , it is enough to have  $23LrR|\kappa_{\min}| \leq L/(4\zeta_D)$ . Note that in Algorithm 2, we ensure  $r \leq (92R|\kappa_{\min}|\zeta_{2r})^{-1}$  which satisfies the previous inequality and also the initial requirement in Proposition 6.1 in (Criscitiello & Boumal, 2021).

After this result, we can use Euclidean machinery on  $\hat{h} : \text{Log}_{x_{k-1}}(\mathcal{X}_k) \rightarrow \mathbb{R}$ , namely AGD (Nesterov, 2005) with a warm start in order to satisfy the condition in Line 8 of Algorithm 1. The algorithm requires projecting into the feasible set, and we note that in our case it is a Euclidean ball so the operation is very simple. Indeed, let  $\hat{\mathcal{X}}_k \stackrel{\text{def}}{=} \text{Log}_{x_{k-1}}(\mathcal{X}_k)$  and let  $\hat{x} \stackrel{\text{def}}{=} \text{Log}_{x_{k-1}}(x)$ , where  $x$  is the center of the prox defining  $g$  above. By (Lin et al., 2017, Proposition 15) we have that  $\hat{x}' \stackrel{\text{def}}{=} \Pi_{\hat{\mathcal{X}}_k}(\Pi_{\hat{\mathcal{X}}_k}(\hat{x}) - \frac{1}{L'}\nabla \hat{h}(\Pi_{\hat{\mathcal{X}}_k}(\hat{x})))$  is a point that satisfies

$$\hat{h}(\hat{x}') - \hat{h}(\hat{y}_h^*) \leq \frac{L'}{2}\|\hat{y}_h^* - \Pi_{\hat{\mathcal{X}}_k}(\hat{x})\|^2 \leq \frac{L'}{2}\|\hat{y}_h^* - \hat{x}\|^2, \quad (12)$$

where  $\hat{y}_h^* \stackrel{\text{def}}{=} \arg \min_{\hat{y} \in \hat{\mathcal{X}}_k} \hat{h}(\hat{y})$  is the minimizer of  $\hat{h}$ , that is, the exact prox. By (Nesterov, 2005), the convergence rate of AGD with  $\hat{x}'$  as initial point is  $O(\sqrt{\frac{L'}{\mu'}} \log(\frac{\hat{h}(\hat{x}') - \hat{h}(\hat{y}_h^*)}{\hat{\varepsilon}}))$ , where  $\hat{\varepsilon} \stackrel{\text{def}}{=} \Delta_{k'}\|\hat{y}_h^* - \hat{x}\|^2/(78\lambda)$  is the accuracy we will require, which is less than the accuracy required by Algorithm 1:  $\Delta_{k'}d(\hat{x}, \hat{y}_h^*)^2/(78\lambda)$ . Here  $k'$  is the internal counter for Algorithm 1 and we used the reasoning above yielding that the condition number of  $\hat{h}$  is  $O(\frac{L'}{\mu'}) = O(\bar{\zeta})$ . Using (12), we conclude that it is enough to run AGD for  $O(\bar{\zeta}^{\frac{1}{2}} \log(\frac{78\lambda L'}{2\Delta_{k'}})) = \tilde{O}(\bar{\zeta}^{\frac{1}{2}})$  gradient oracle queries.

**Remark B.2.** We can make Algorithm 2 work under a weaker assumption than Assumption 2.3 after a minor modification on the algorithm. Because the algorithm in (Criscitiello & Boumal, 2021) can work with bounded  $\|\nabla \mathfrak{R}\| \leq F$  for a constant  $F$ , we can use it as a subroutine in this more generic case. In such a case, the diameter of the balls  $\mathcal{X}_k$  must be  $D \leq \frac{|\kappa_{\min}|}{2F}$ , and it is enough to change the condition in Line 1 to  $2R \leq \min\{(46R|\kappa_{\min}|\zeta_{2R})^{-1}, |\kappa_{\min}|/(2F)\}$  and if this condition is not satisfied, then after computing  $D$  in Line 2, we further update  $D \leftarrow \min\{D, |\kappa_{\min}|/(2F)\}$ . In this way, the condition is satisfied and the geometric penalty is  $\tilde{O}(\frac{R}{D}) = \tilde{O}(\zeta^2 + \frac{RF}{|\kappa_{\min}|})$  instead of  $\tilde{O}(\zeta^2)$ .

<sup>3</sup>This bound corresponds to the case of Hadamard manifolds. Their statement applies more generally to manifolds of bounded sectional curvature, in which case  $|\kappa_{\min}|$  would be substituted by  $\max\{|\kappa_{\min}|, \kappa_{\max}\}$ .



## C GEOMETRIC LEMMAS

In this section, we state and prove [Lemma C.5](#), which is used in the proof of [Theorem 2.2](#) to show that the lower bound given by  $f(y_k^*) + \langle \tilde{v}_k^y, x - y_k^* \rangle$  that is affine if pulled back to  $T_{y_k^*}$  can be bounded by another function, that is affine if pulled back to  $T_{x_k}$ . We also include and prove, with some generalizations, some known Riemannian inequalities that are used in Riemannian optimization methods and that we also use. The second part of the following lemma appeared in ([Kim & Yang, 2022](#)). Similarly with the second part of the corollary that follows.

In this section, unless otherwise specified,  $\mathcal{M}$  is an  $n$ -dimensional Riemannian manifold of bounded sectional curvature.

**Lemma C.1.** *Let  $x, y, p \in \mathcal{M}$  be the vertices of a uniquely geodesic triangle  $\mathcal{T}$  of diameter  $D$ , and let  $z^x \in T_x \mathcal{M}$ ,  $z^y \stackrel{\text{def}}{=} \Gamma_x^y(z^x) + \text{Log}_y(x)$ , such that  $y = \text{Exp}_x(rz^x)$  for some  $r \in [0, 1]$ . If we take vectors  $a^y \in T_y \mathcal{M}$ ,  $a^x \stackrel{\text{def}}{=} \Gamma_y^x(a^y) \in T_x \mathcal{M}$ , then we have the following, for all  $\xi \geq \zeta_D$ :*

$$\begin{aligned} & \|z^y + a^y - \text{Log}_y(p)\|_y^2 + (\delta_D - 1)\|z^y + a^y\|_y^2 \\ & \geq \|z^x + a^x - \text{Log}_x(p)\|_x^2 + (\delta_D - 1)\|z^x + a^x\|_x^2 - \frac{\xi - \delta_D}{2} \left( \frac{r}{1-r} \right) \|a^x\|_x^2, \end{aligned}$$

and

$$\begin{aligned} & \|z^y + a^y - \text{Log}_y(p)\|_y^2 + (\xi - 1)\|z^y + a^y\|_y^2 \\ & \leq \|z^x + a^x - \text{Log}_x(p)\|_x^2 + (\xi - 1)\|z^x + a^x\|_x^2 + \frac{\xi - \delta_D}{2} \left( \frac{r}{1-r} \right) \|a^x\|_x^2. \end{aligned}$$

*Proof.* Let  $\gamma$  be the unique geodesic in  $\mathcal{T}$  such that  $\gamma(0) = x$  and  $\gamma(r) = y$ . We have  $\gamma'(0) = z^x$ . Along  $\gamma$ , we define the vector field  $V(t) = \Gamma_0^t(\gamma)(z^x - t\gamma'(0))$ . Then, it is  $V'(t) = -\gamma'(t)$ , and  $\|V(t)\| = \|a + (1-t)z^x\|$ . We will make use of the potential  $w : [0, r] \rightarrow \mathbb{R}$  defined as  $w(t) = \|\text{Log}_{\gamma(t)}(x) - V(t)\|^2$ . We can compute

$$\begin{aligned} \frac{d}{dt} w(t) &= 2\langle D_t(\text{Log}_{\gamma(t)}(x) - V(t)), \text{Log}_{\gamma(t)}(x) - V(t) \rangle \\ &= 2\langle D_t \text{Log}_{\gamma(t)}(x), \text{Log}_{\gamma(t)}(x) \rangle - 2\langle D_t \text{Log}_{\gamma(t)}(x), V(t) \rangle \\ &\quad - 2\langle D_t V(t), \text{Log}_{\gamma(t)}(x) \rangle + 2\langle D_t V(t), V(t) \rangle \\ &= -2\langle D_t(\text{Log}_{\gamma(t)}(x), V(t)) \rangle + 2\langle D_t V(t), V(t) \rangle. \end{aligned} \tag{13}$$

Now, we bound the first summand. We use that for the function  $\Phi_p(x) = \frac{1}{2}d(x, p)^2$  it holds, for every  $\xi \geq \zeta_D$ :

$$-\frac{\xi - \delta_D}{2}\|v\|^2 \leq \langle \text{Hess } \Phi_p(\gamma(t))[v] - \frac{\xi + \delta_D}{2}v, v \rangle \leq \frac{\xi - \delta_D}{2}\|v\|^2,$$

due to [Fact 1.2](#). So for  $\beta \in \{-1, 1\}$  we obtain the following bound:

$$\begin{aligned} -2\beta\langle D_t \text{Log}_{\gamma(t)}(x), V(t) \rangle &= 2\beta\langle \text{Hess } \Phi_p(\gamma(t))[\gamma'(t)], V(t) \rangle \\ &= 2\beta\langle (\text{Hess } \Phi_p(\gamma(t)) - \frac{\xi + \delta_D}{2}I)[\gamma'(t)], V(t) \rangle + \beta\langle (\xi + \delta_D)\gamma'(t), V(t) \rangle \\ &\leq 2\|\text{Hess } \Phi_p(\gamma(t)) - \frac{\xi + \delta_D}{2}I\| \cdot \|\gamma'(t)\| \cdot \|V(t)\| + \beta\langle (\xi + \delta_D)\gamma'(t), V(t) \rangle \\ &\leq 2\frac{\xi - \delta_D}{2}\|\gamma'(t)\| \cdot \|V(t)\| + \beta\langle (\xi + \delta_D)\gamma'(t), V(t) \rangle \\ &\stackrel{\textcircled{1}}{=} 2\frac{\xi - \delta_D}{2}\|z^x\| \cdot \|a + (1-t)z^x\| + \beta(\xi + \delta_D)\langle z^x, a + (1-t)z^x \rangle \end{aligned}$$

Gauss lemma is used in the last summand of ①. Now, if  $\beta = -1$ , we have

$$\begin{aligned}
-2\langle D_t \text{Log}_{\gamma(t)}(x), V(t) \rangle &\geq -2\frac{\xi - \delta_D}{2} \|z^x\| \cdot \|a + (1-t)z^x\| + (\xi + \delta_D) \langle z^x, a + (1-t)z^x \rangle \\
&\stackrel{\textcircled{1}}{\geq} -\frac{\xi - \delta_D}{2(1-t)} (\|(1-t)z^x\|^2 + \|a + (1-t)z^x\|^2) + (\xi - \delta_D) \langle z^x, a + (1-t)z^x \rangle - 2\delta_D \langle -z^x, a + (1-t)b \rangle \\
&\geq -\frac{\xi - \delta_D}{2(1-t)} (\|a\|^2 + 2\langle a + (1-t)z^x \rangle) + (\xi - \delta_D) \langle z^x, a \rangle - 2\delta_D \langle -z^x, a + (1-t)b \rangle \\
&\geq -\frac{\xi - \delta_D}{2(1-t)} \|a\|^2 - 2\delta_D \langle D_t V(t), V(t) \rangle.
\end{aligned} \tag{14}$$

On the other hand, analogously, if  $\beta = 1$ , we have

$$\begin{aligned}
-2\langle D_t \text{Log}_{\gamma(t)}(x), V(t) \rangle &\leq 2\frac{\xi - \delta_D}{2} \|z^x\| \cdot \|a + (1-t)z^x\| + (\xi + \delta_D) \langle z^x, a + (1-t)z^x \rangle \\
&\stackrel{\textcircled{1}}{\leq} \frac{\xi - \delta_D}{2(1-t)} (\|(1-t)z^x\|^2 + \|a + (1-t)z^x\|^2) - (\xi - \delta_D) \langle z^x, a + (1-t)z^x \rangle - 2\xi \langle -z^x, a + (1-t)b \rangle \\
&\leq \frac{\xi - \delta_D}{2(1-t)} (\|a\|^2 + 2\langle a + (1-t)z^x \rangle) - (\xi - \delta_D) \langle z^x, a \rangle - 2\xi \langle -z^x, a + (1-t)b \rangle \\
&\leq \frac{\xi - \delta_D}{2(1-t)} \|a\|^2 - 2\xi \langle D_t V(t), V(t) \rangle,
\end{aligned} \tag{15}$$

where ① is Young's inequality  $2cd \leq c^2 + d^2$ . Combining (13), (14), (15), we obtain

$$-\frac{\xi - \delta_D}{2(1-t)} \|a\|^2 - 2(\delta_D - 1) \langle D_t V(t), V(t) \rangle \leq \frac{d}{dt} w(t) \leq \frac{\xi - \delta_D}{2(1-t)} \|a\|^2 - 2(\xi - 1) \langle D_t V(t), V(t) \rangle.$$

Integrating between 0 and  $r < 1$ , it results in

$$\begin{aligned}
\frac{\xi - \delta_D}{2} \log(1-r) \|a\|^2 - (\delta_D - 1) (\|V(r)\|^2 - \|V(0)\|^2) &\leq w(r) - w(0) \\
&\leq -\frac{\xi - \delta_D}{2} \log(1-r) \|a\|^2 - (\xi - 1) (\|V(r)\|^2 - \|V(0)\|^2).
\end{aligned}$$

Using the bound  $-\log(1-r) \leq \frac{r}{1-r}$  for  $r \in [0, 1)$  and using the values of  $w(\cdot)$  and  $V(\cdot)$ , we obtain the result.  $\square$

**Corollary C.2.** *Let  $x, y, p \in \mathcal{M}$  be the vertices of a uniquely geodesic triangle of diameter  $D$ , and let  $z^x \in T_x \mathcal{M}$ ,  $z^y \stackrel{\text{def}}{=} \Gamma_x^y(z^x) + \text{Log}_y(x)$ , such that  $y = \text{Exp}_x(rz^x)$  for some  $r \in [0, 1)$ . Then, the following holds*

$$\|z^y - \text{Log}_y(p)\|^2 + (\delta_D - 1) \|z^y\|^2 \geq \|z^x - \text{Log}_x(p)\|^2 + (\delta_D - 1) \|z^x\|^2,$$

and

$$\|z^y - \text{Log}_y(p)\|^2 + (\zeta_D - 1) \|z^y\|^2 \leq \|z^x - \text{Log}_x(p)\|^2 + (\zeta_D - 1) \|z^x\|^2.$$

*Proof.* Use Lemma C.1 with  $a^y = 0$ . Note that this corollary allows  $r = 1$  as well. We obtain this result, by continuity, by taking a limit when  $r \rightarrow 1$ .  $\square$

The following is a lemma that is already known and is used extensively in Riemannian first-order optimization. It turns out it is a special case of Corollary C.2.

**Corollary C.3 (Cosine-Law Inequalities).** *For the vertices  $x, y, p \in \mathcal{M}$  of a uniquely geodesic triangle of diameter  $D$ , we have*

$$\langle \text{Log}_x(y), \text{Log}_x(p) \rangle \geq \frac{\delta_D}{2} d(x, y)^2 + \frac{1}{2} d(p, x)^2 - \frac{1}{2} d(p, y)^2.$$

and

$$\langle \text{Log}_x(y), \text{Log}_x(p) \rangle \leq \frac{\zeta_D}{2} d(x, y)^2 + \frac{1}{2} d(p, x)^2 - \frac{1}{2} d(p, y)^2$$

*Proof.* This is [Corollary C.2](#) for  $r = 1$ . Indeed, given  $y \in \mathcal{T}$  we can use [Corollary C.2](#) with  $z^x = \text{Log}_x(y)$ . Note that in such a case we have  $\|z^x\| = d(x, y)$  and  $z^y = 0$ . Using  $\|\text{Log}_y(p)\| = d(y, p)$  and

$$\begin{aligned}\|z^x - \text{Log}_x(p)\| &= \|z^x\|^2 - \langle z^x, \text{Log}_x(p) \rangle + \|\text{Log}_x(p)\|^2 \\ &= d(x, y)^2 - 2\langle \text{Log}_x(y), \text{Log}_x(p) \rangle + d(p, x)^2,\end{aligned}$$

we obtain the result.  $\square$

**Remark C.4.** Actually, in Hadamard manifolds, if we substitute the constants  $\delta_D$  and  $\zeta_D$  in the previous [Corollary C.3](#) by the tighter constants  $\delta_{d(p,x)}$  and  $\zeta_{d(p,x)}$ , the result also holds. See ([Zhang & Sra, 2016](#)).

We now proceed to prove a lemma that intuitively says that solving the exact proximal point problem can be used to lower bound  $f$ . One should think about the following lemma as being applied to  $y \leftarrow y_k^*$ ,  $x \leftarrow x_k$ . Compare the result of the following lemma with the Euclidean equality  $\langle g, p - y \rangle = \langle g, p - x \rangle + \|g\|^2$ , for  $g = x - y$  and  $x, y, p \in \mathbb{R}^n$ .

**Lemma C.5.** Let  $x, y, p \in \mathcal{M}$  be the vertices of a uniquely geodesic triangle of diameter  $D$ . Define the vectors  $g \stackrel{\text{def}}{=} \text{Log}_y(x) \in T_y\mathcal{M}$  and  $g^x = \Gamma_y^x(g) = -\text{Log}_x(y) \in T_x\mathcal{M}$ . Then we have

$$\langle g, \text{Log}_y(p) \rangle \geq \langle g^x, \text{Log}_x(p) \rangle + \delta_D \|g\|^2,$$

and

$$\langle g, \text{Log}_y(p) \rangle \leq \langle g^x, \text{Log}_x(p) \rangle + \zeta_D \|g\|^2.$$

*Proof* ([Lemma C.5](#)). Using the definition of  $g$ , we have ① below, by the first part of [Corollary C.3](#):

$$\begin{aligned}\langle g, \text{Log}_y(p) \rangle &\stackrel{\textcircled{1}}{\geq} \frac{\delta_D}{2} \|g\|^2 + \frac{d(y, p)^2}{2} - \frac{d(x, p)^2}{2} \\ &\stackrel{\textcircled{2}}{\geq} \langle g^x, \text{Log}_x(p) \rangle + \delta_D \|g^x\|^2,\end{aligned}$$

and in ② we used [Corollary C.3](#) again but with a different choice of vertices so we have  $\frac{d(y, p)^2}{2} \geq \frac{\delta_D}{2} \|g^x\|^2 + \frac{d(x, p)^2}{2} + \langle g^x, \text{Log}_x(p) \rangle$ .

The proof of the second part is analogous: using the definition of  $g$ , we have ① below, by the second part of [Corollary C.3](#):

$$\begin{aligned}\langle g, \text{Log}_y(p) \rangle &\stackrel{\textcircled{1}}{\leq} \frac{\zeta_D}{2} \|g\|^2 + \frac{d(y, p)^2}{2} - \frac{d(x, p)^2}{2} \\ &\stackrel{\textcircled{2}}{\leq} \langle g^x, \text{Log}_x(p) \rangle + \zeta_D \|g^x\|^2,\end{aligned}$$

and in ② we used [Corollary C.3](#) again but with a different choice of vertices so we have  $\frac{d(y, p)^2}{2} \leq \frac{\zeta_D}{2} \|g^x\|^2 + \frac{d(x, p)^2}{2} + \langle g^x, \text{Log}_x(p) \rangle$ .  $\square$

asdf
